# Supplementary material for: Local-environment regulation engineering to boost acidic H2O2 electrosynthesis on cobalt porphyrin molecular electrocatalyst
Source: Research Square preprint supplement (doi:10.21203/rs.3.rs-3269437/v1), 2023-08-23
Supplement: Supplementary file 1 [file 363581ee999ed35112d3cb0f.docx]

**Supporting information**

**Local-environment regulation engineering to boost acidic H2O2 electrosynthesis on cobalt porphyrin molecular electrocatalyst**

Yihe Chen1,2, Cheng Zhen3,4, Hao Zhao2, Yuda Wang2, Zhouying Yue2, Qiansen Wang1,2, Jun Li2, Meng Gu4, Qingqing Cheng2* & Hui Yang1,2*

1School of Physical Science and Technology, ShanghaiTech University, Shanghai, 201210, P. R. China.

2Shanghai Advanced Research Institute, Chinese Academy of Sciences, Shanghai, 201210, P. R. China.

3Department of Materials Science and Engineering, Southern University of Science and Technology, Shenzhen, Guangdong, 518055, P. R. China.

4Eastern Institute for Advanced Study, Eastern Institute of Technology, Ningbo, Zhejiang, 315200, P. R. China

*e-mails: [chengqq@sari.ac.cn](mailto:chengqq@sari.ac.cn); [yangh@sari.ac.cn](mailto:yangh@sari.ac.cn)

**Supplementary Methods**

**The contents quantification of OFGs in RGO.** We investigate the variations of different OFGs by quantifying their actual contents in various samples. The contents of OFGs are expressed in milligrams and calculated by the following equation:

(1a)

Where OFGX represents a specific type of OFG, mRGO is the mass of RGO after treatment at a certain temperature, ERO is the elemental ratio of O in RGO-T, and RX is the proportion of OFGX among all OFGs.

For ease of comparison, the initial mass of all GO samples is set to 1000 mg. The values of mRGO were obtained by repeatedly weighing the mass of RGO and selecting the most stable values, which are 787.8 mg, 741.2 mg, 466.3 mg, 446.6 mg, and 439.7 mg corresponding to 160, 170, 260, 400 and 700 oC, respectively, and these values are in good agreement with the TGA curve. ERO is obtained through XPS spectra of RGO (Supplementary Fig.1, Table 1). RX can be obtained by deconvoluting the high-resolution O 1s XPS spectra (Supplementary Fig. 2), where the three peaks correspond to three types of OFGs. Therefore, the actual content of C-O-C at 160 oC is calculated as follows:

(1b)

Therefore, the actual content of C-O-C at 160 oC is 71.18 mg. Similarly, the actual contents obtained under various temperature for other OFGs are derived and the results are shown in Fig. 1e.

**The measurement for surface work function of carbon plane.** The work function describes the energy difference between Fermi energy level and vacuum level. For RGO, the surface work function can provide feedback on the electron delocalization, as changes in electron delocalization lead to alterations in electron energy[1](#_ENREF_1). Calculating the surface work function allows for a comparison of the electron states on different RGO surfaces, thereby facilitating an understanding about the interaction mechanism of OFGs. The surface work function of RGO can be calculated using the following equation:

(2a)

Where φs is the work function of the sample, φt is the work function of the tip, and VCPD represents the contact potential of the sample.

The φt is used as offset in the software. To know exact value of φs from VCPD measurements, a calibration of φt is required. The calibration is done by measuring on a reference sample with well-known work function value such as Au (φ = 5.1 eV), and then the φt can be calculated via Eq. (2). The calculated value of φt is 5.317 eV.

After this calibration, the φs can be attained via measuring the surface contact potentials of RGO by KPFM[2](#_ENREF_2), which are 0.518V, 0.8V, 0.561V, and 0.753V corresponding to 160, 170, 260 and 400 oC, respectively. Therefore, the φs of RGO-160 is calculated as follows:

(2b)

Therefore, the φs of RGO-160 is 4.799 eV. Similarly, the φs obtained on other RGO samples are derived and the results are shown in Fig. 3f.

**Supplementary Figures**


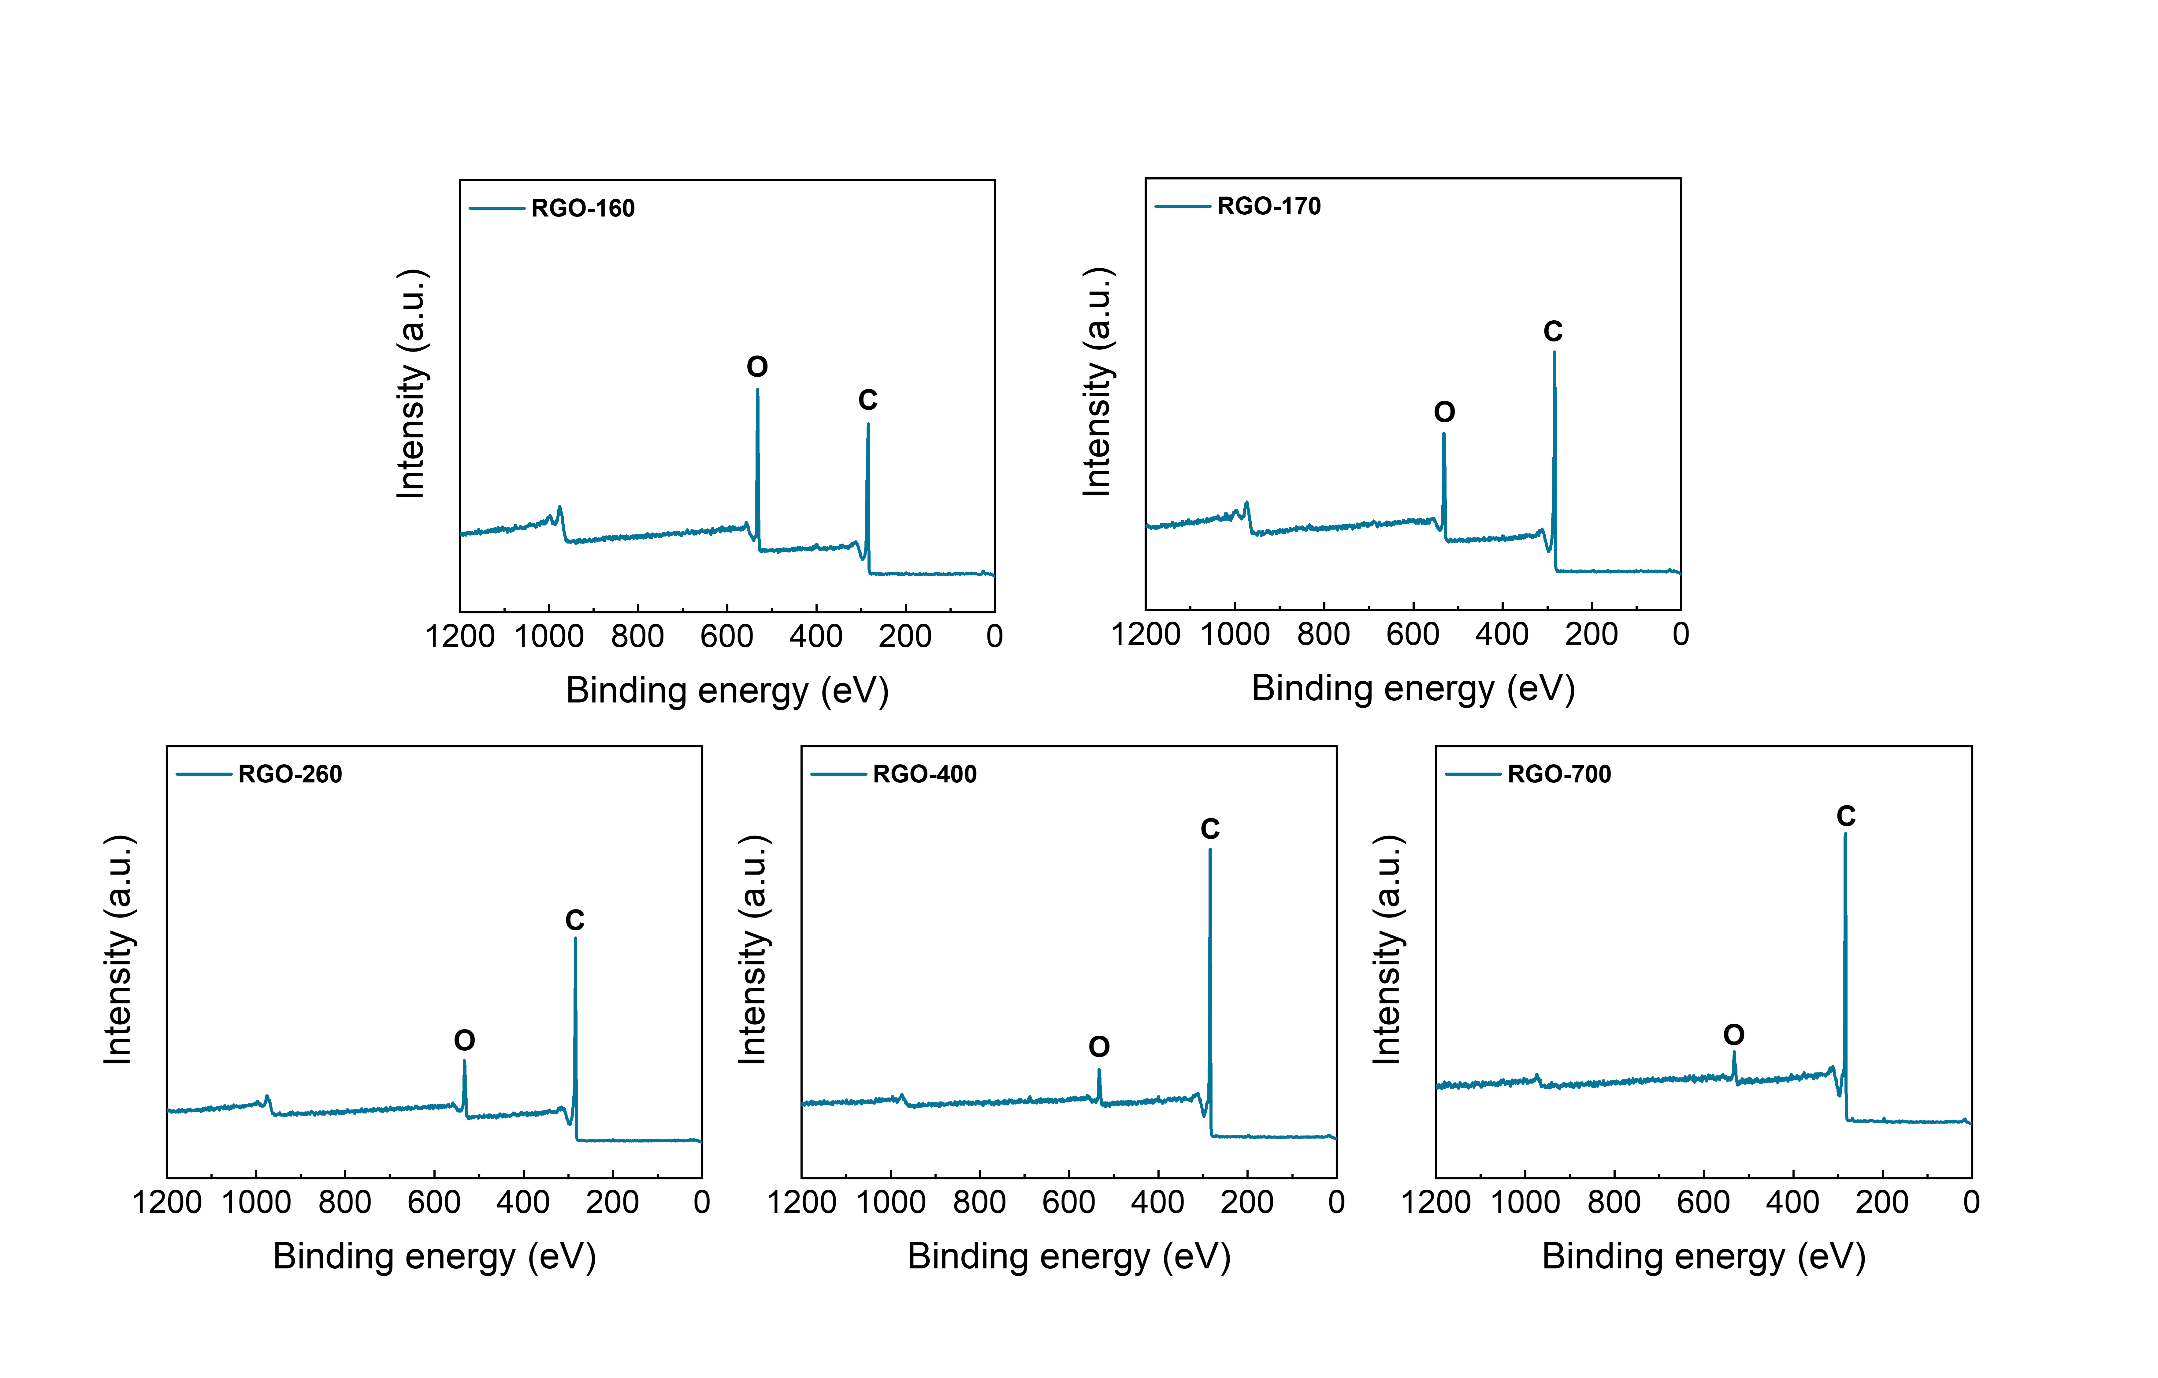


**Supplementary Figure 1. Elemental constitutes of the RGO-T carriers by XPS.** Only C and O elements are detected above the detection limit. Changes in O content can be observed at five temperature nodes, indicating variations in content of OFGs within certain temperature ranges. The values of O content were listed in Supplementary Table 1.


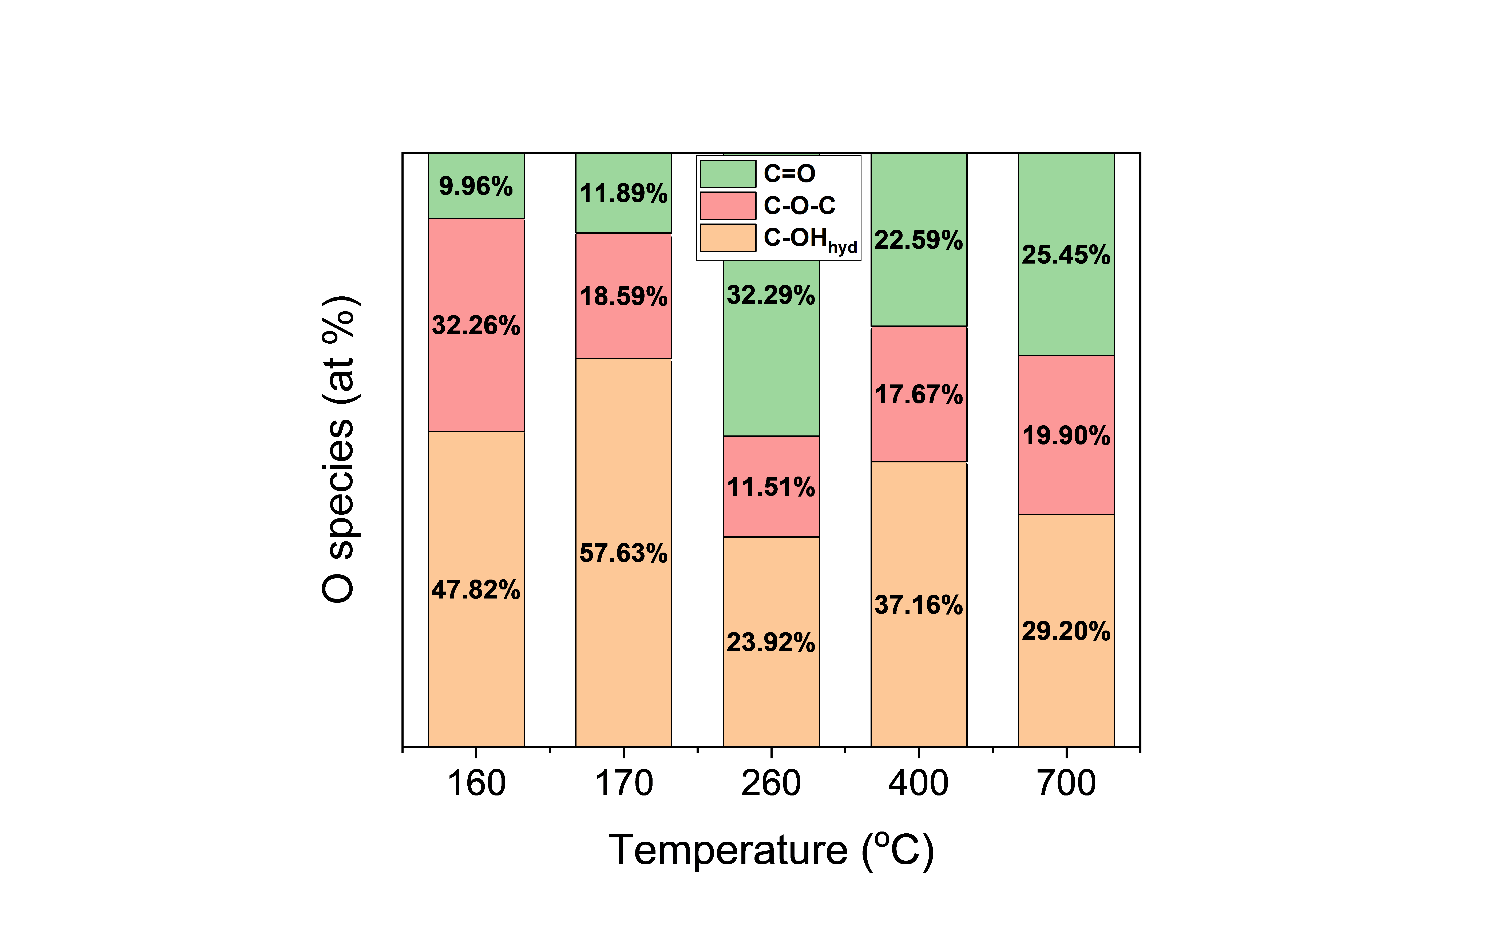


**Supplementary Figure 2. Comparison of O species and the corresponding content in RGO-T by deconvolution of high-resolution O 1s XPS spectra.**

**Supplementary Note 1:** O 1s high-resolution spectra indicate that the O species in RGO-T exist in the forms of C=O (~530 eV), C-O-C (~531.3 eV) and C-OH (~532.5 eV)[3](#_ENREF_3), [4](#_ENREF_4). It is noteworthy that the conclusion does not match that of FT-IR if examining the content of -OH groups directly from the result of the deconvolution, while assuming that C=O originates from -COOH and subtracting the -OH originating from -COOH provide the correct outcome. Therefore, the varied OFGs during the thermal treatment include C-O-C, -COOH, and -OH, and C-OHhyd represents the content of -OH after subtracting the COOH portion in the above figure.


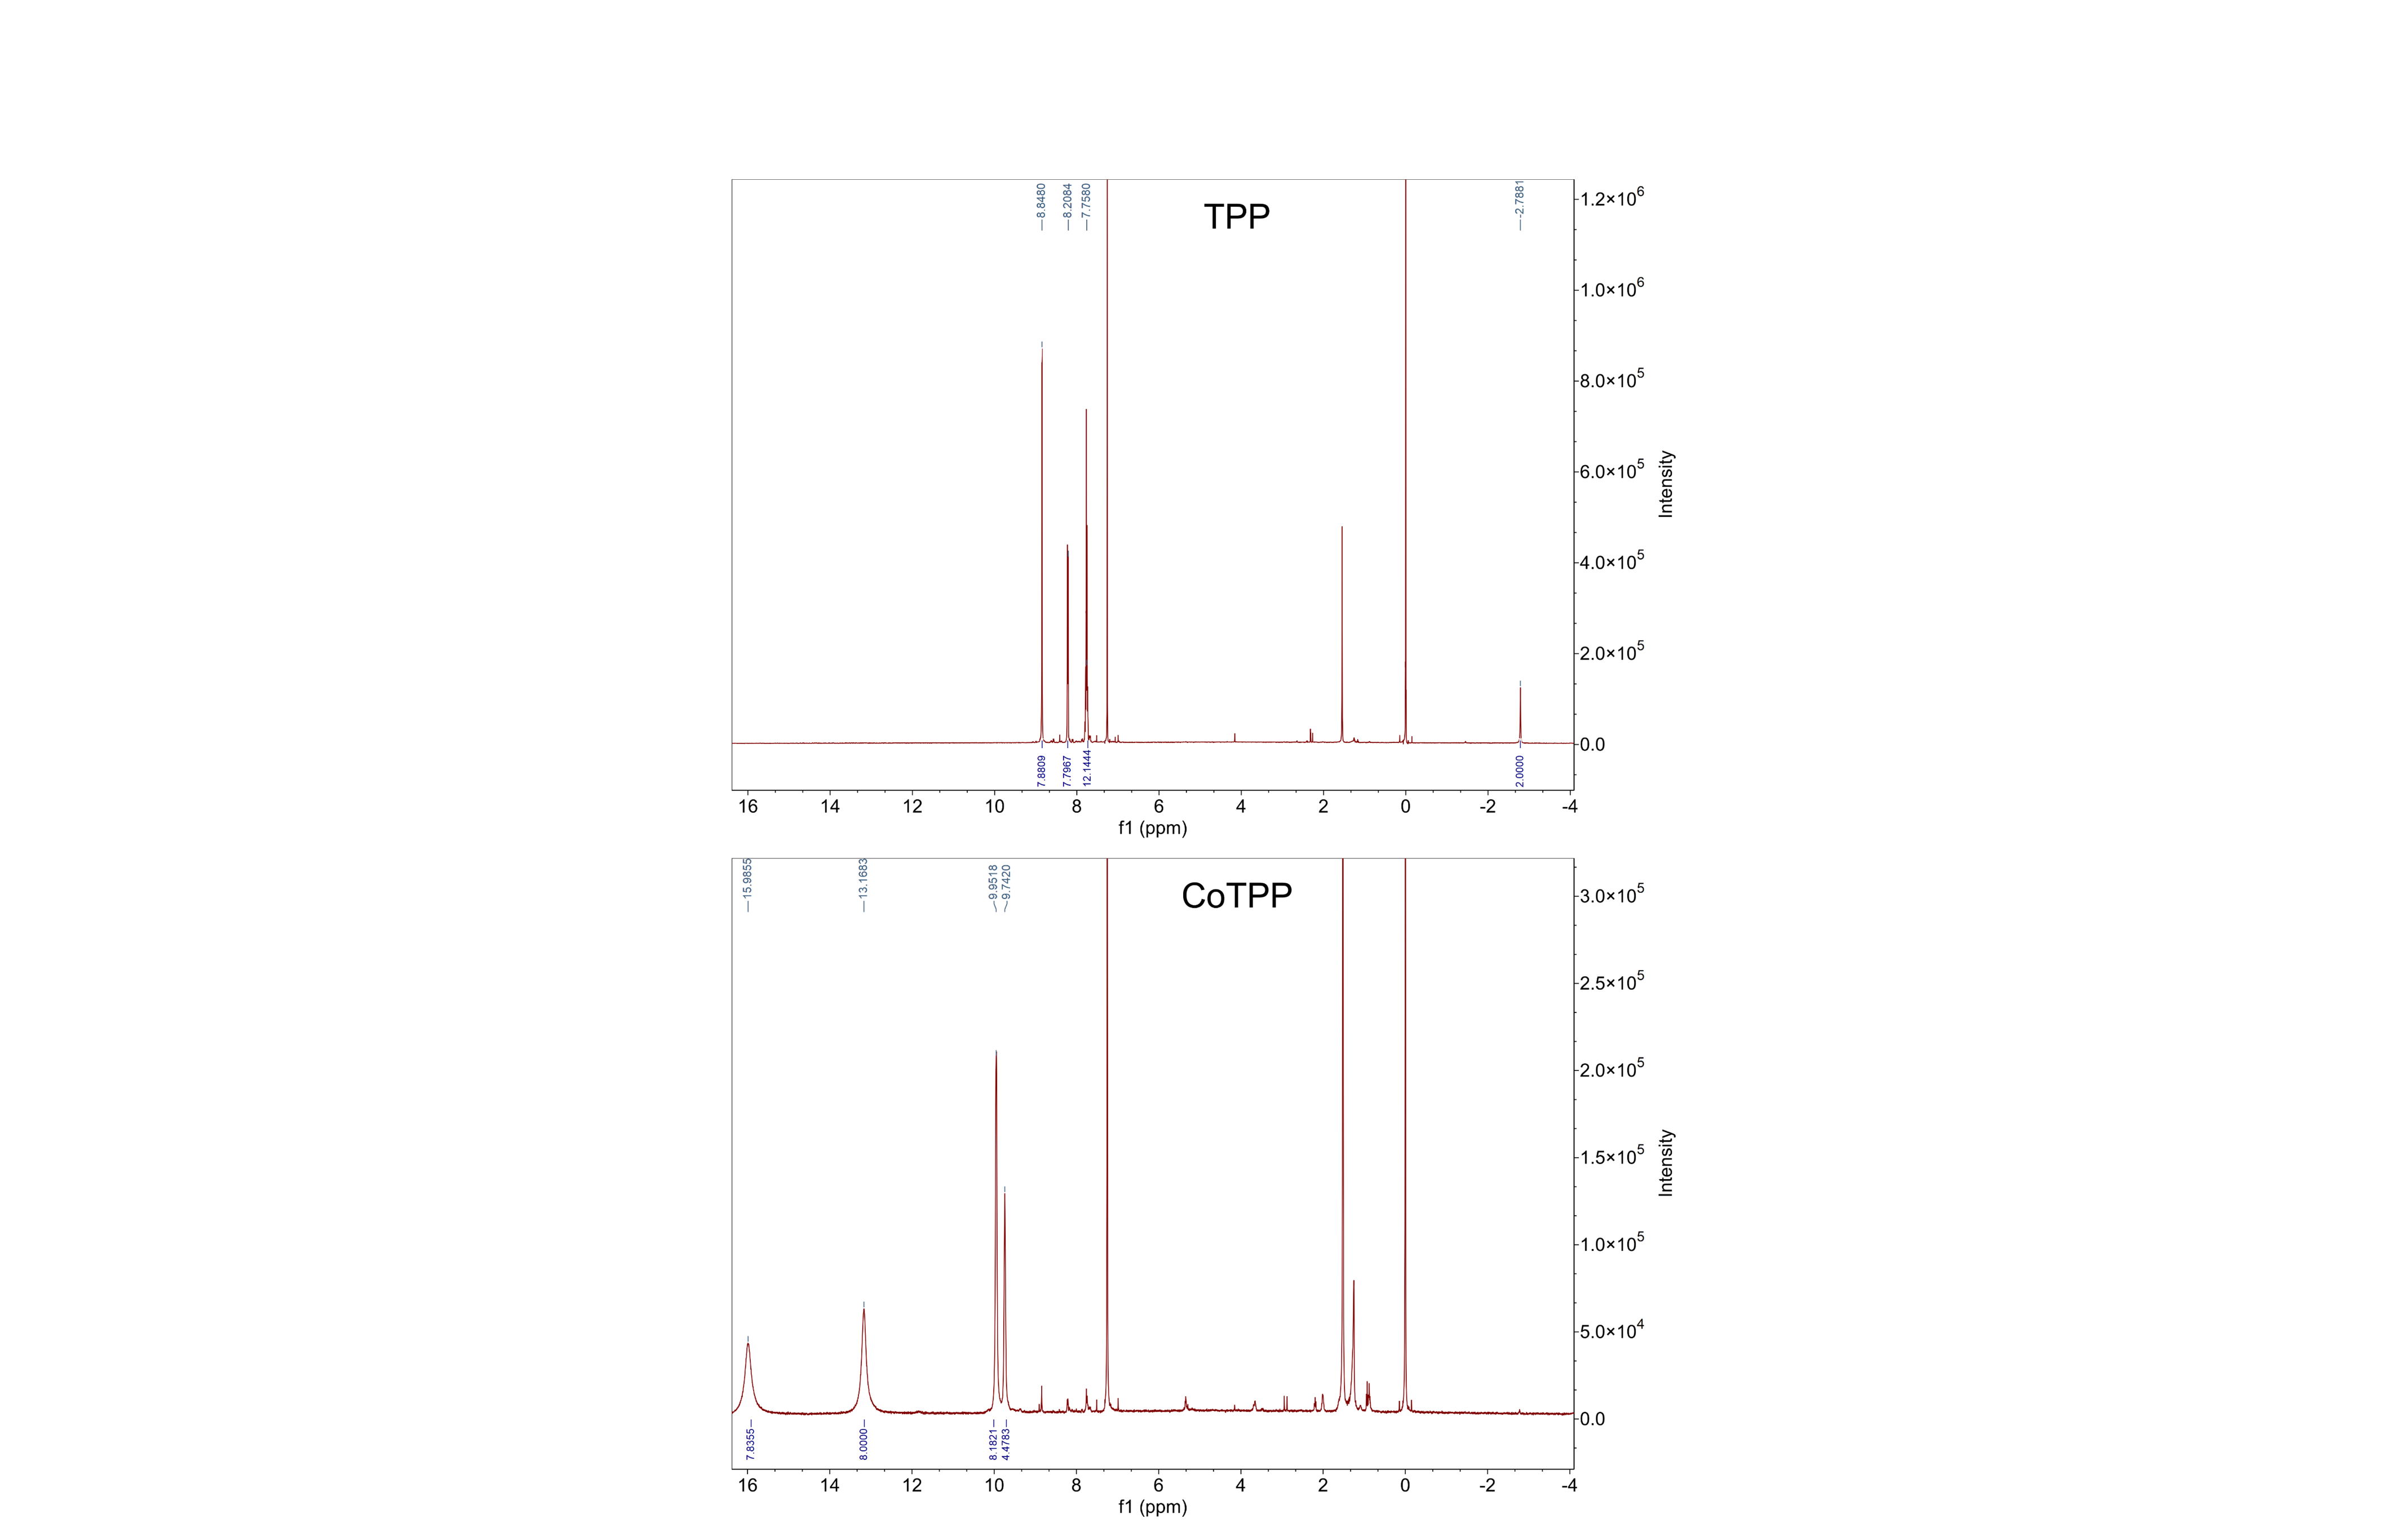


**Supplementary Figure 3. The 1H NMR spectra of TPP and CoTPP (CDCl3, 400 MHz).** The peak of TPP: δ 8.85 (s, 8H), δ 8.24-8.2 (d, 8H), δ 7.83-7.74 (m, 12H), δ -2.79 (s, 2H). The peak of CoTPP: δ 15.99 (s, 8H), δ 13.17 (s, 8H), δ 9.95 (d, 8H), δ 9.74 (s, 4H).


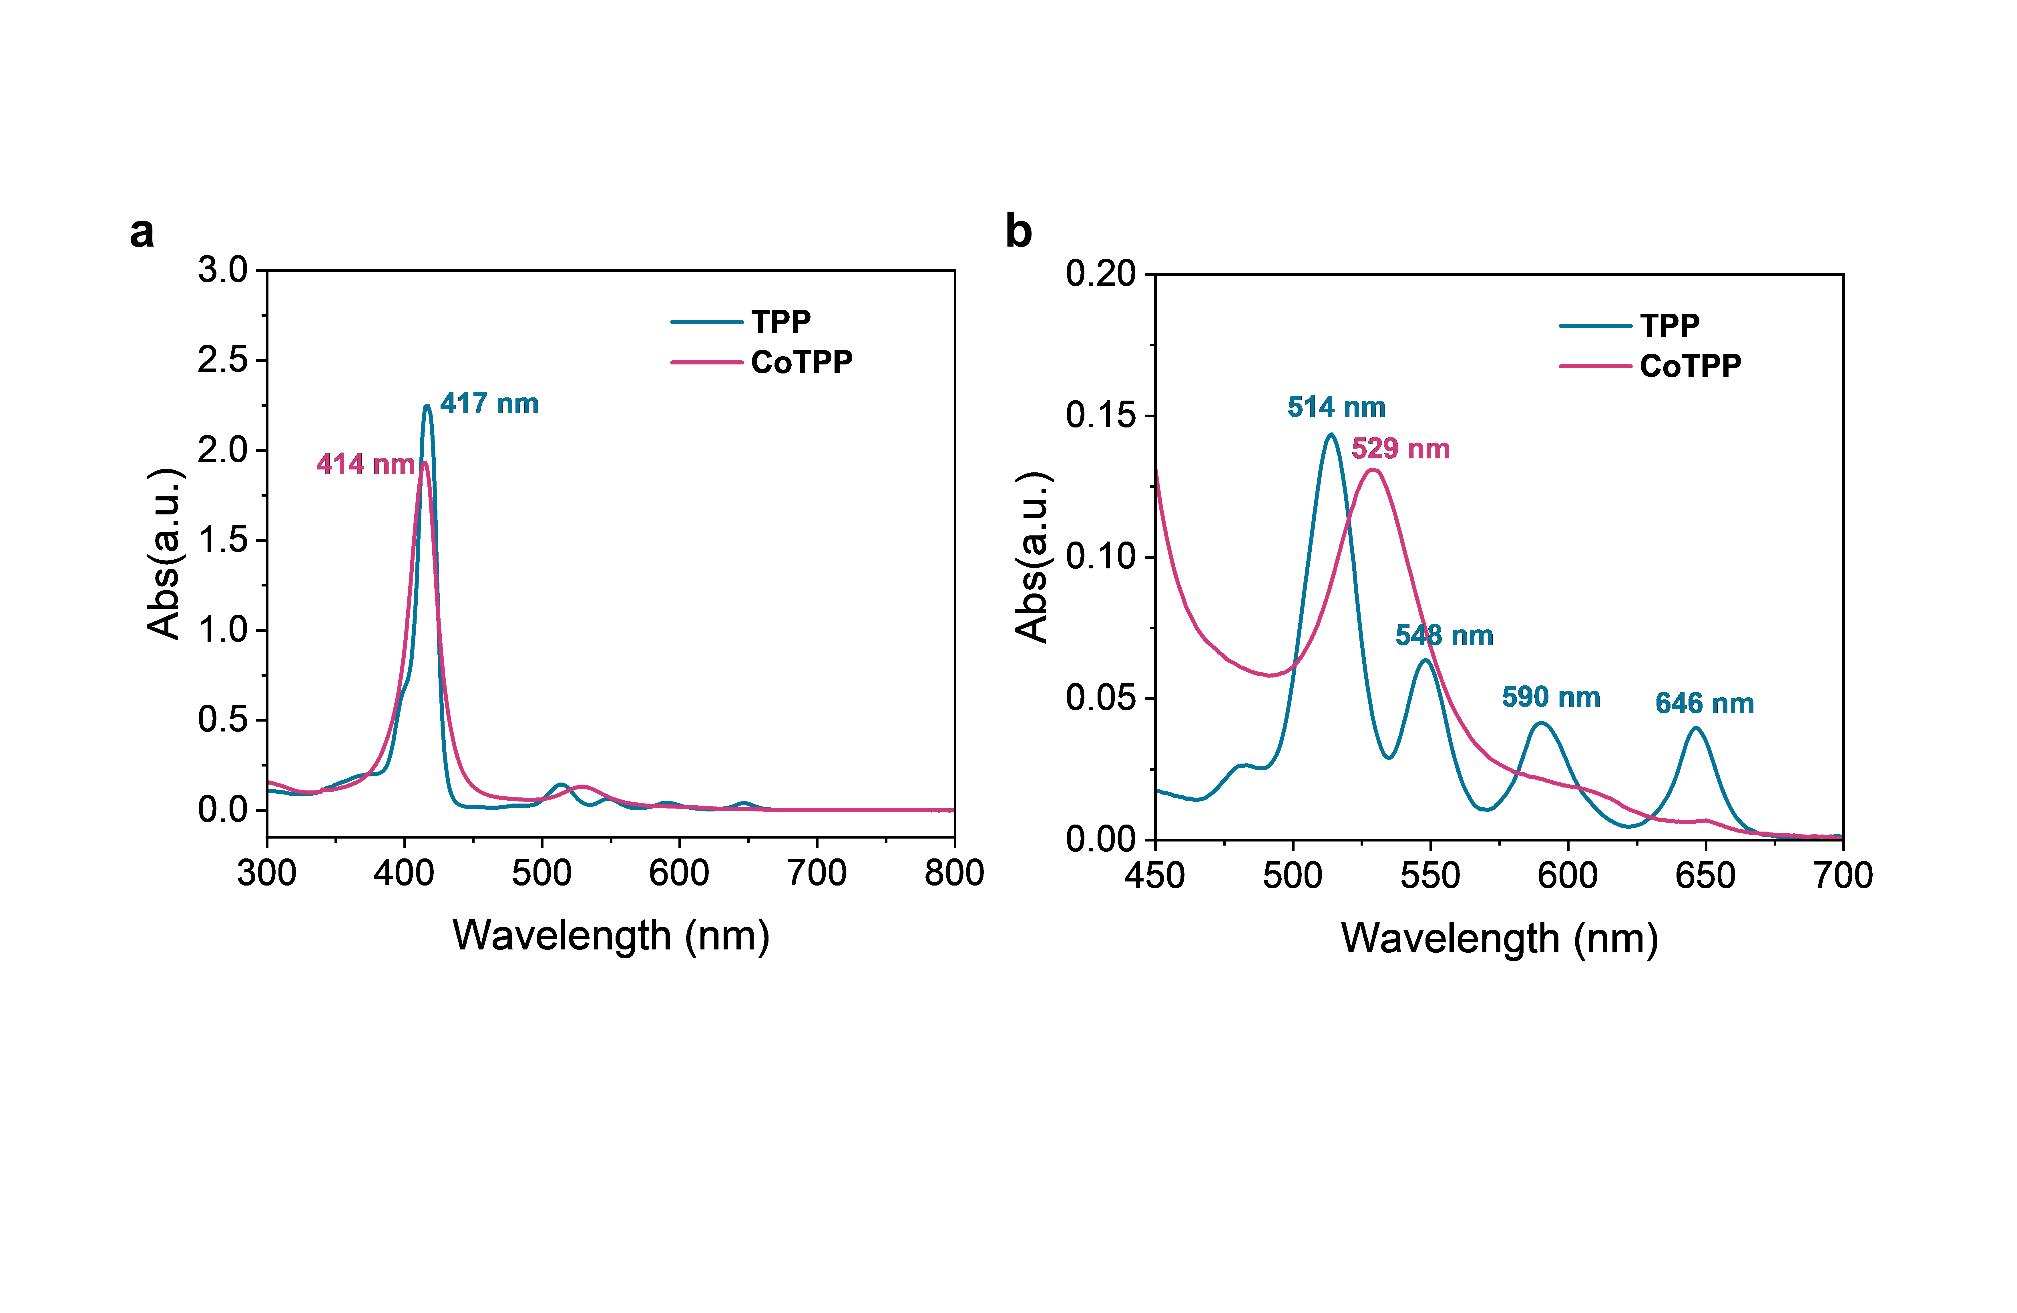


**Supplementary Figure 4. UV-Vis spectra of TPP and home-made CoTPP molecules (dissolved in DMF). (a)** and **(b)** show the information of the Soret band and Q bands respectively.

**Supplementary Note 2:** UV-Vis spectra are used to demonstrate the successful coordination of the TPP ligand with the Co ion. In the UV-Vis spectra of TPP, the Soret band around 415-420 nm reflects the structure of TPP, while the Q bands between 500-700 nm reflect molecular symmetry. Upon coordination of TPP with the Co ion, the molecular symmetry increases from D2h to D4h, leading to increased molecular orbital degeneracy and consequently a reduction in the number of Q band peaks. Additionally, the introduction of the Co ion alters the electronic transition energy of TPP, resulting in a shift in the Soret band. Our characterized results align with these circumstances, indicating the successful synthesis of CoTPP.


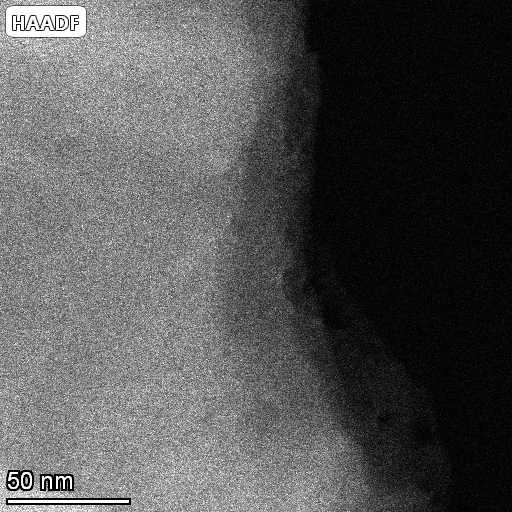


**Supplementary Figure 5. High-resolution HAADF-STEM image of the CoTPP@RGO catalyst.**


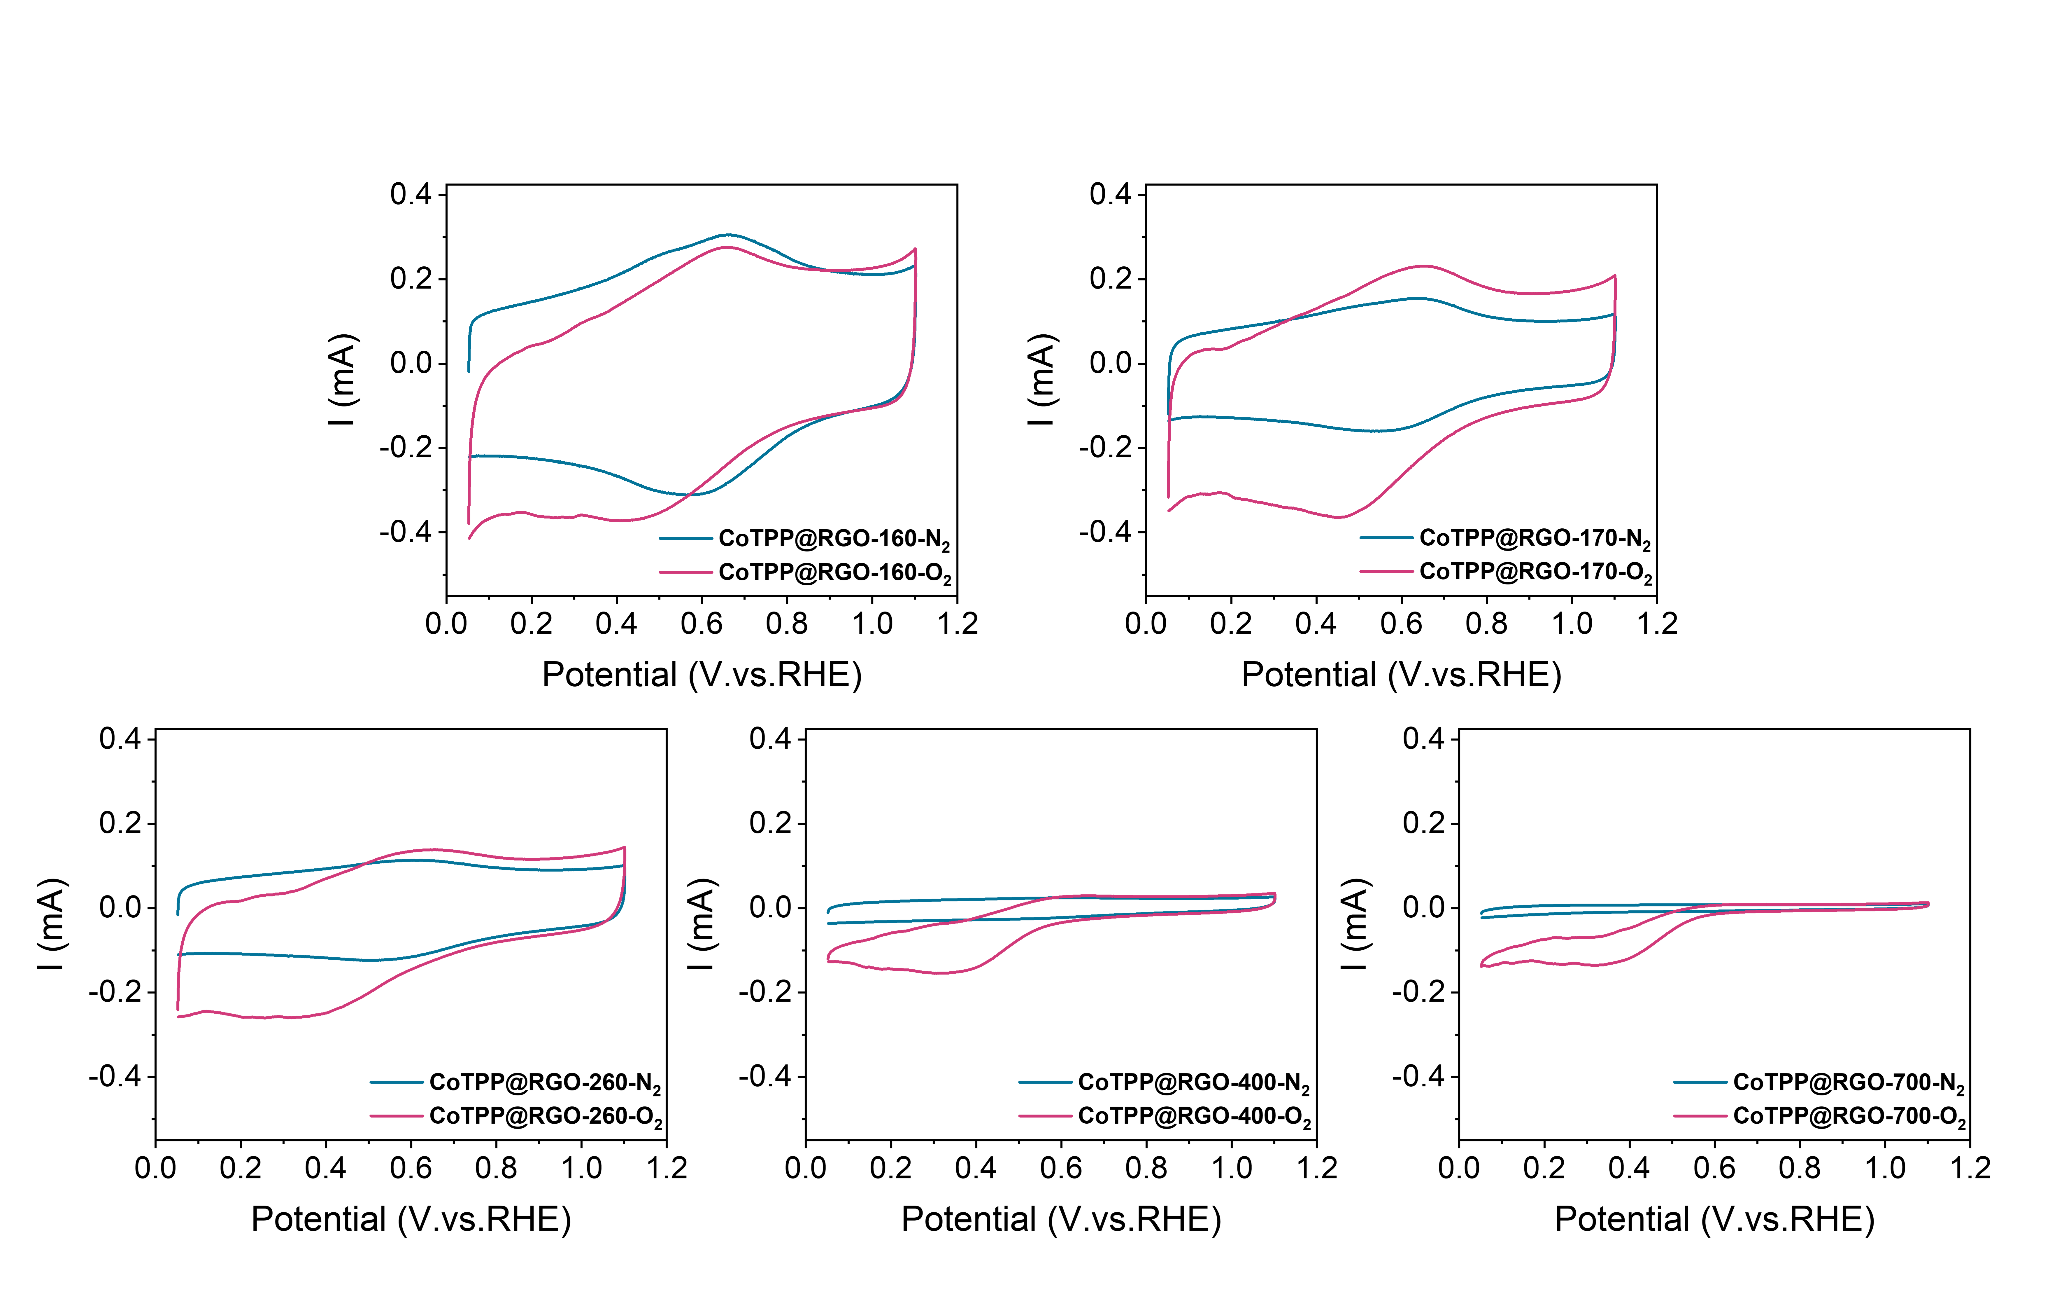


**Supplementary Figure 6. Cyclic voltammetry analysis of the CoTPP@RGO-T catalysts in 0.5M H2SO4 with a scan rate of 50 mV S-1.** As the heating temperature of the carriers increases, the decrease of current on the catalyst suggests a deterioration in its electronic conductivity.


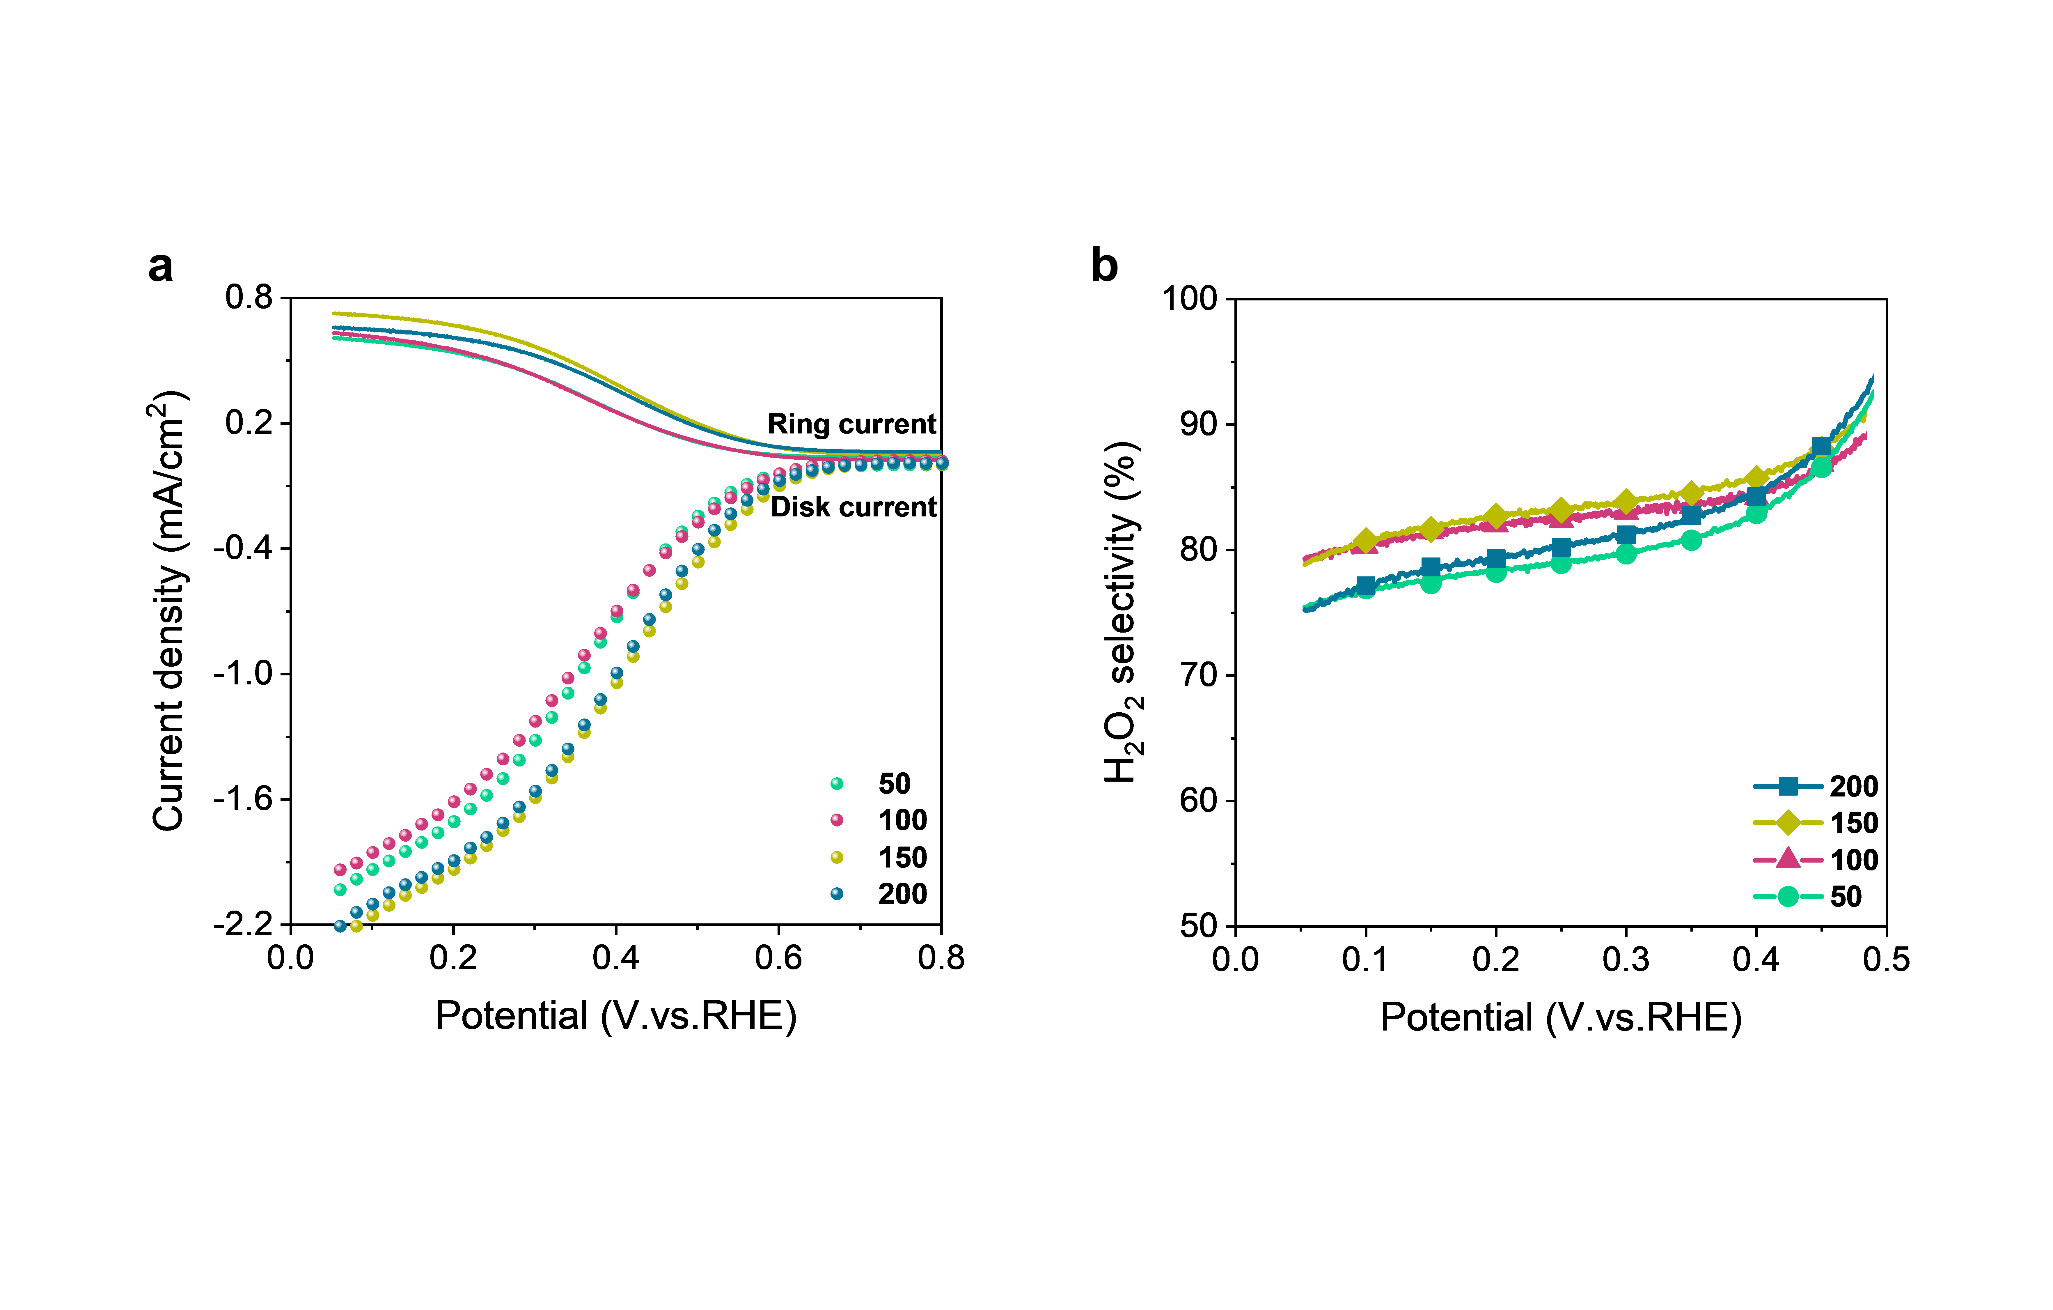


**Supplementary Figure 7. The (a) LSV curves and (b) H2O2 selectivity of the CoTPP**

**@RGO-160 catalyst with different loadings on RRDE at 1600 r.p.m. in 0.5M H2SO4.** Taking both activity and selectivity into consideration, a loading of 150 μg cm-2 is optimal.


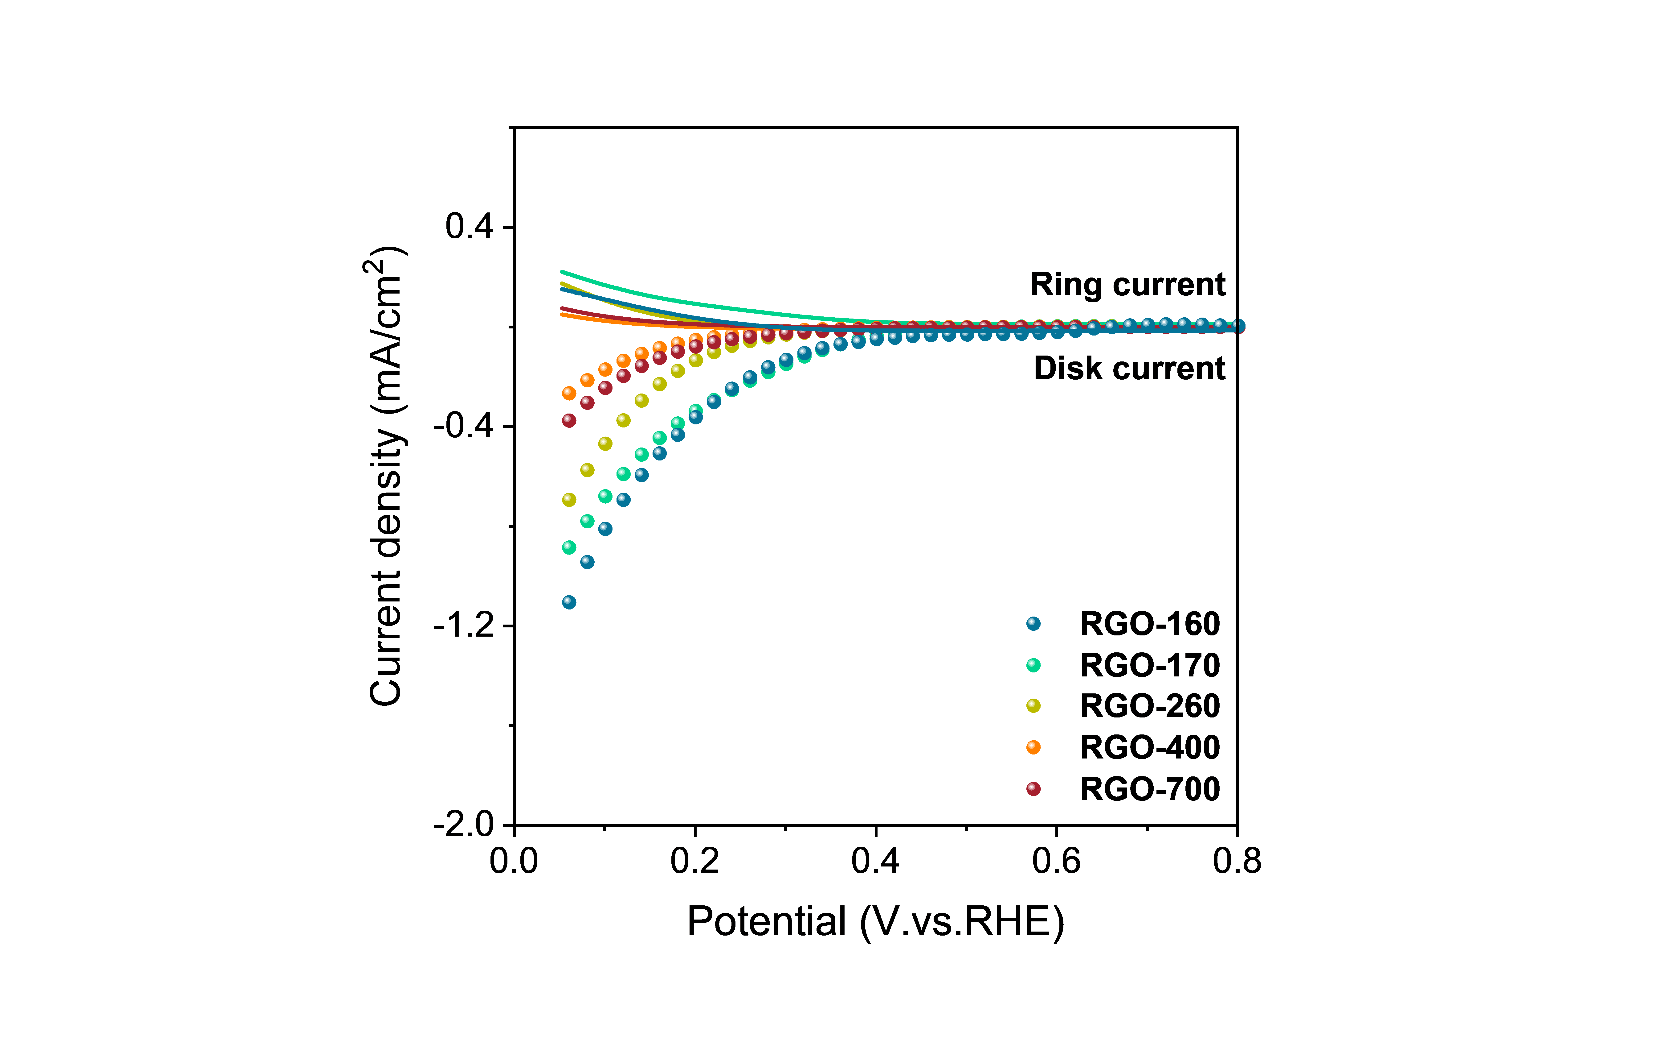


**Supplementary Figure 8. The ORR performance of the RGO-T carriers at 1600 r.p.m. in 0.5M H2SO4.**


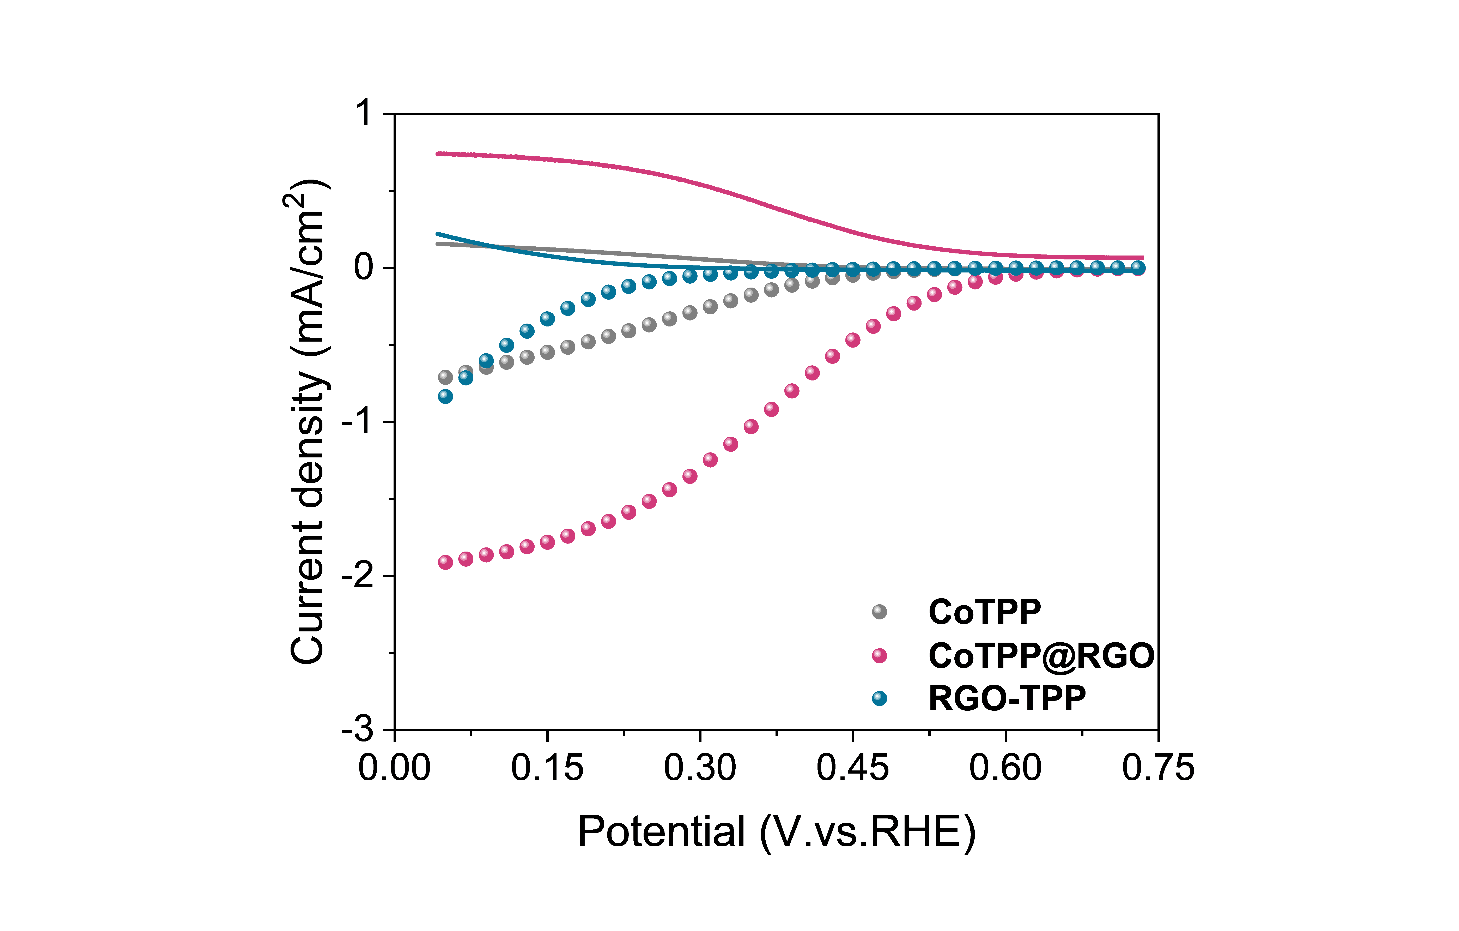


**Supplementary Figure 9. Comparison of ORR performance among the CoTPP molecular, the CoTPP@RGO-160 catalyst and the RGO-TPP catalyst at 1600 r.p.m. in 0.5M H2SO4.**

**Supplementary Note 3:** The RGO-TPP catalyst was obtained by individually assembling the TPP ligand onto the RGO-160 carrier. In comparison to the CoTPP@RGO catalyst, both CoTPP molecules and the RGO-TPP catalyst lack one element each (RGO carrier and Co center, respectively), allowing verification of the true active sites for catalytic reactions.


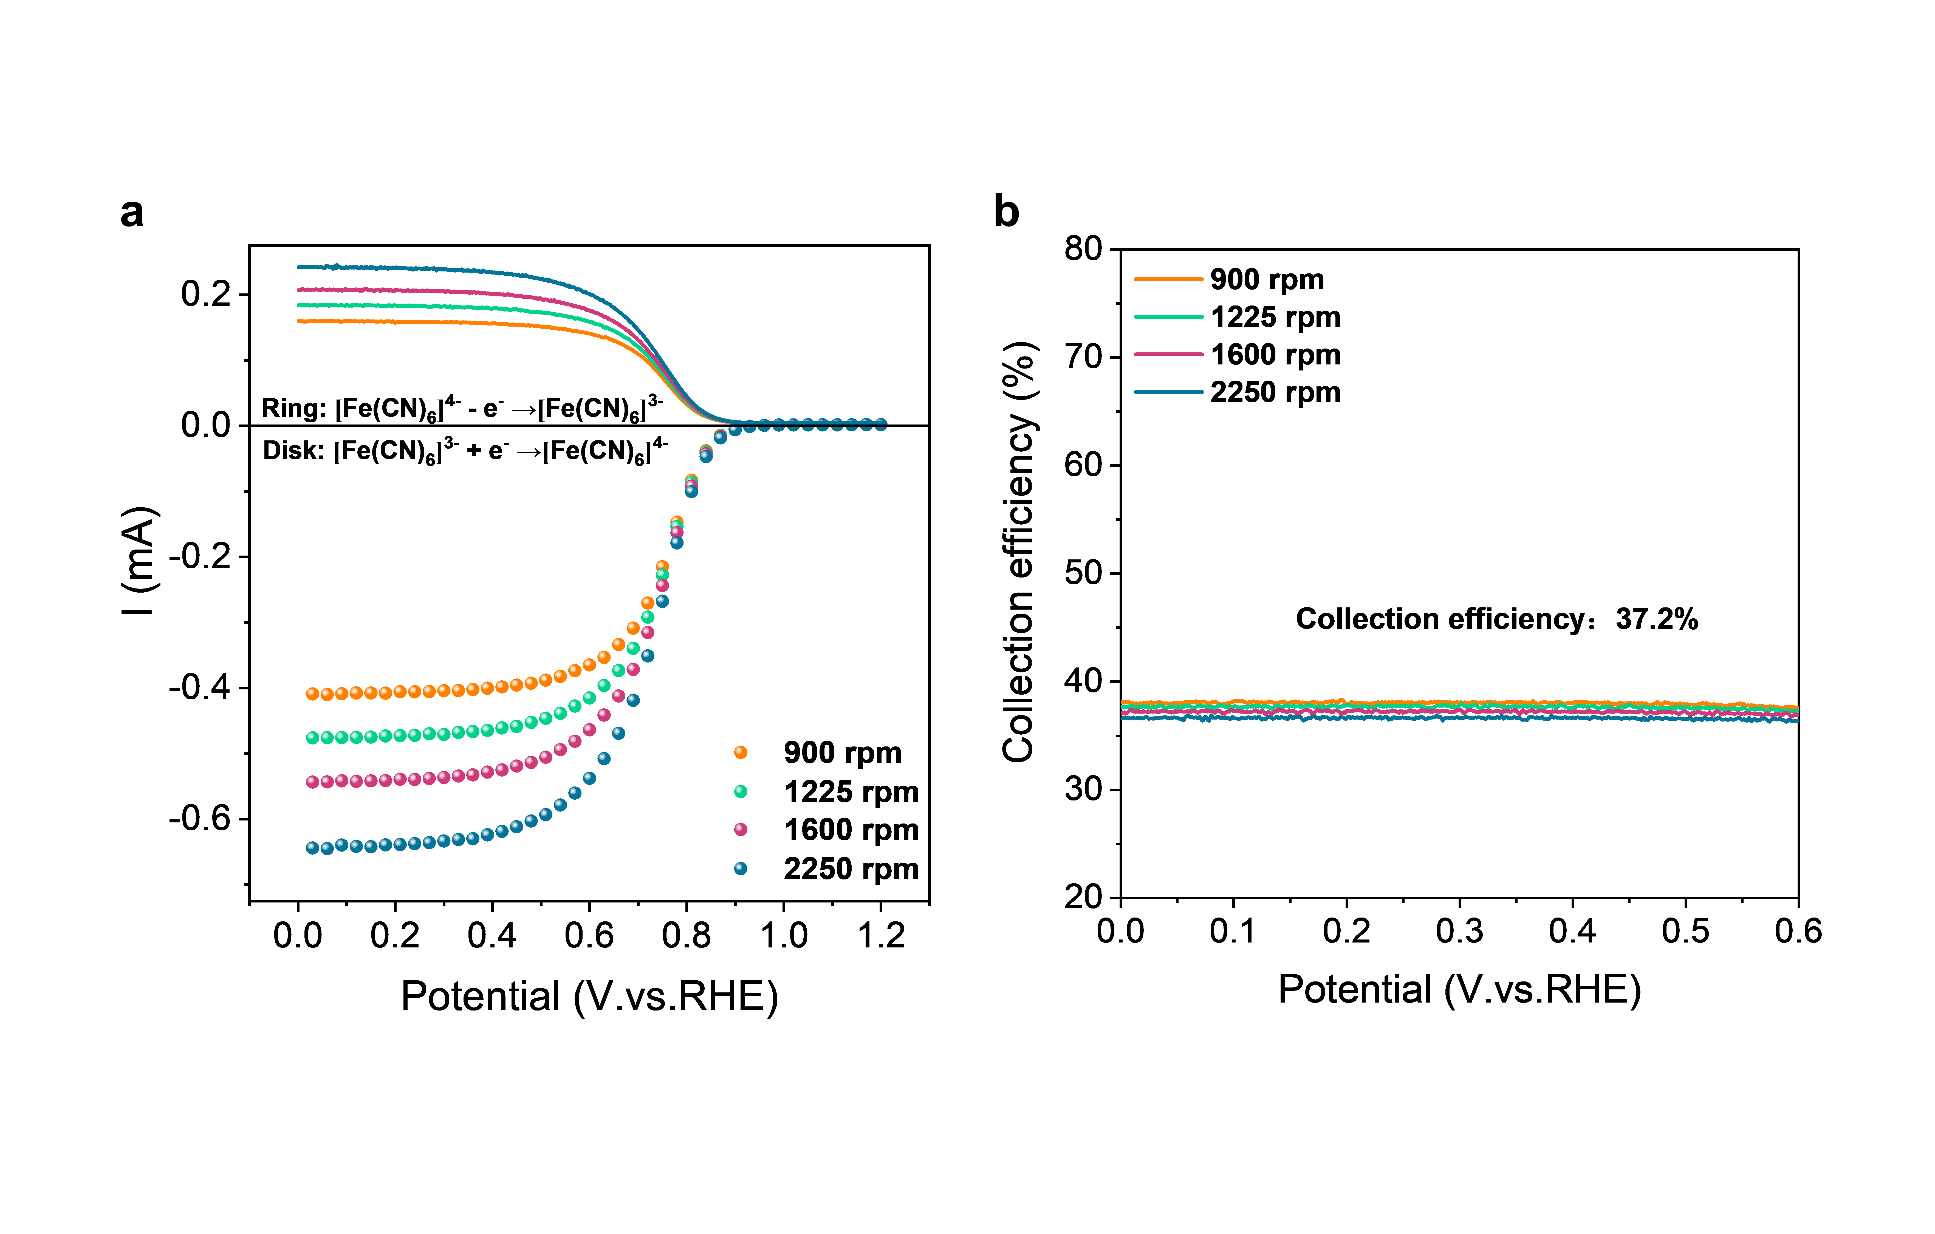


**Supplementary Figure 10. Calibration of the collection efficiency of the bare RRDE in N2-saturated 0.5 M H2SO4 dissolved with 4 mM K3[Fe(CN)6]. (a)** RRDE voltammograms recorded at different rotation rates by performing LSV on the disk from 1.20 V to 0 V vs. RHE at 50 mV s-1 while holding the ring at 1.40 V vs. RHE. **(b)** The corresponding collection efficiency of RRDE voltammograms as a function of the potential. The collection efficiency is calculated as N = Ir /(−Id), where Ir and Id are the current on the Pt ring and glass carbon disk, respectively.


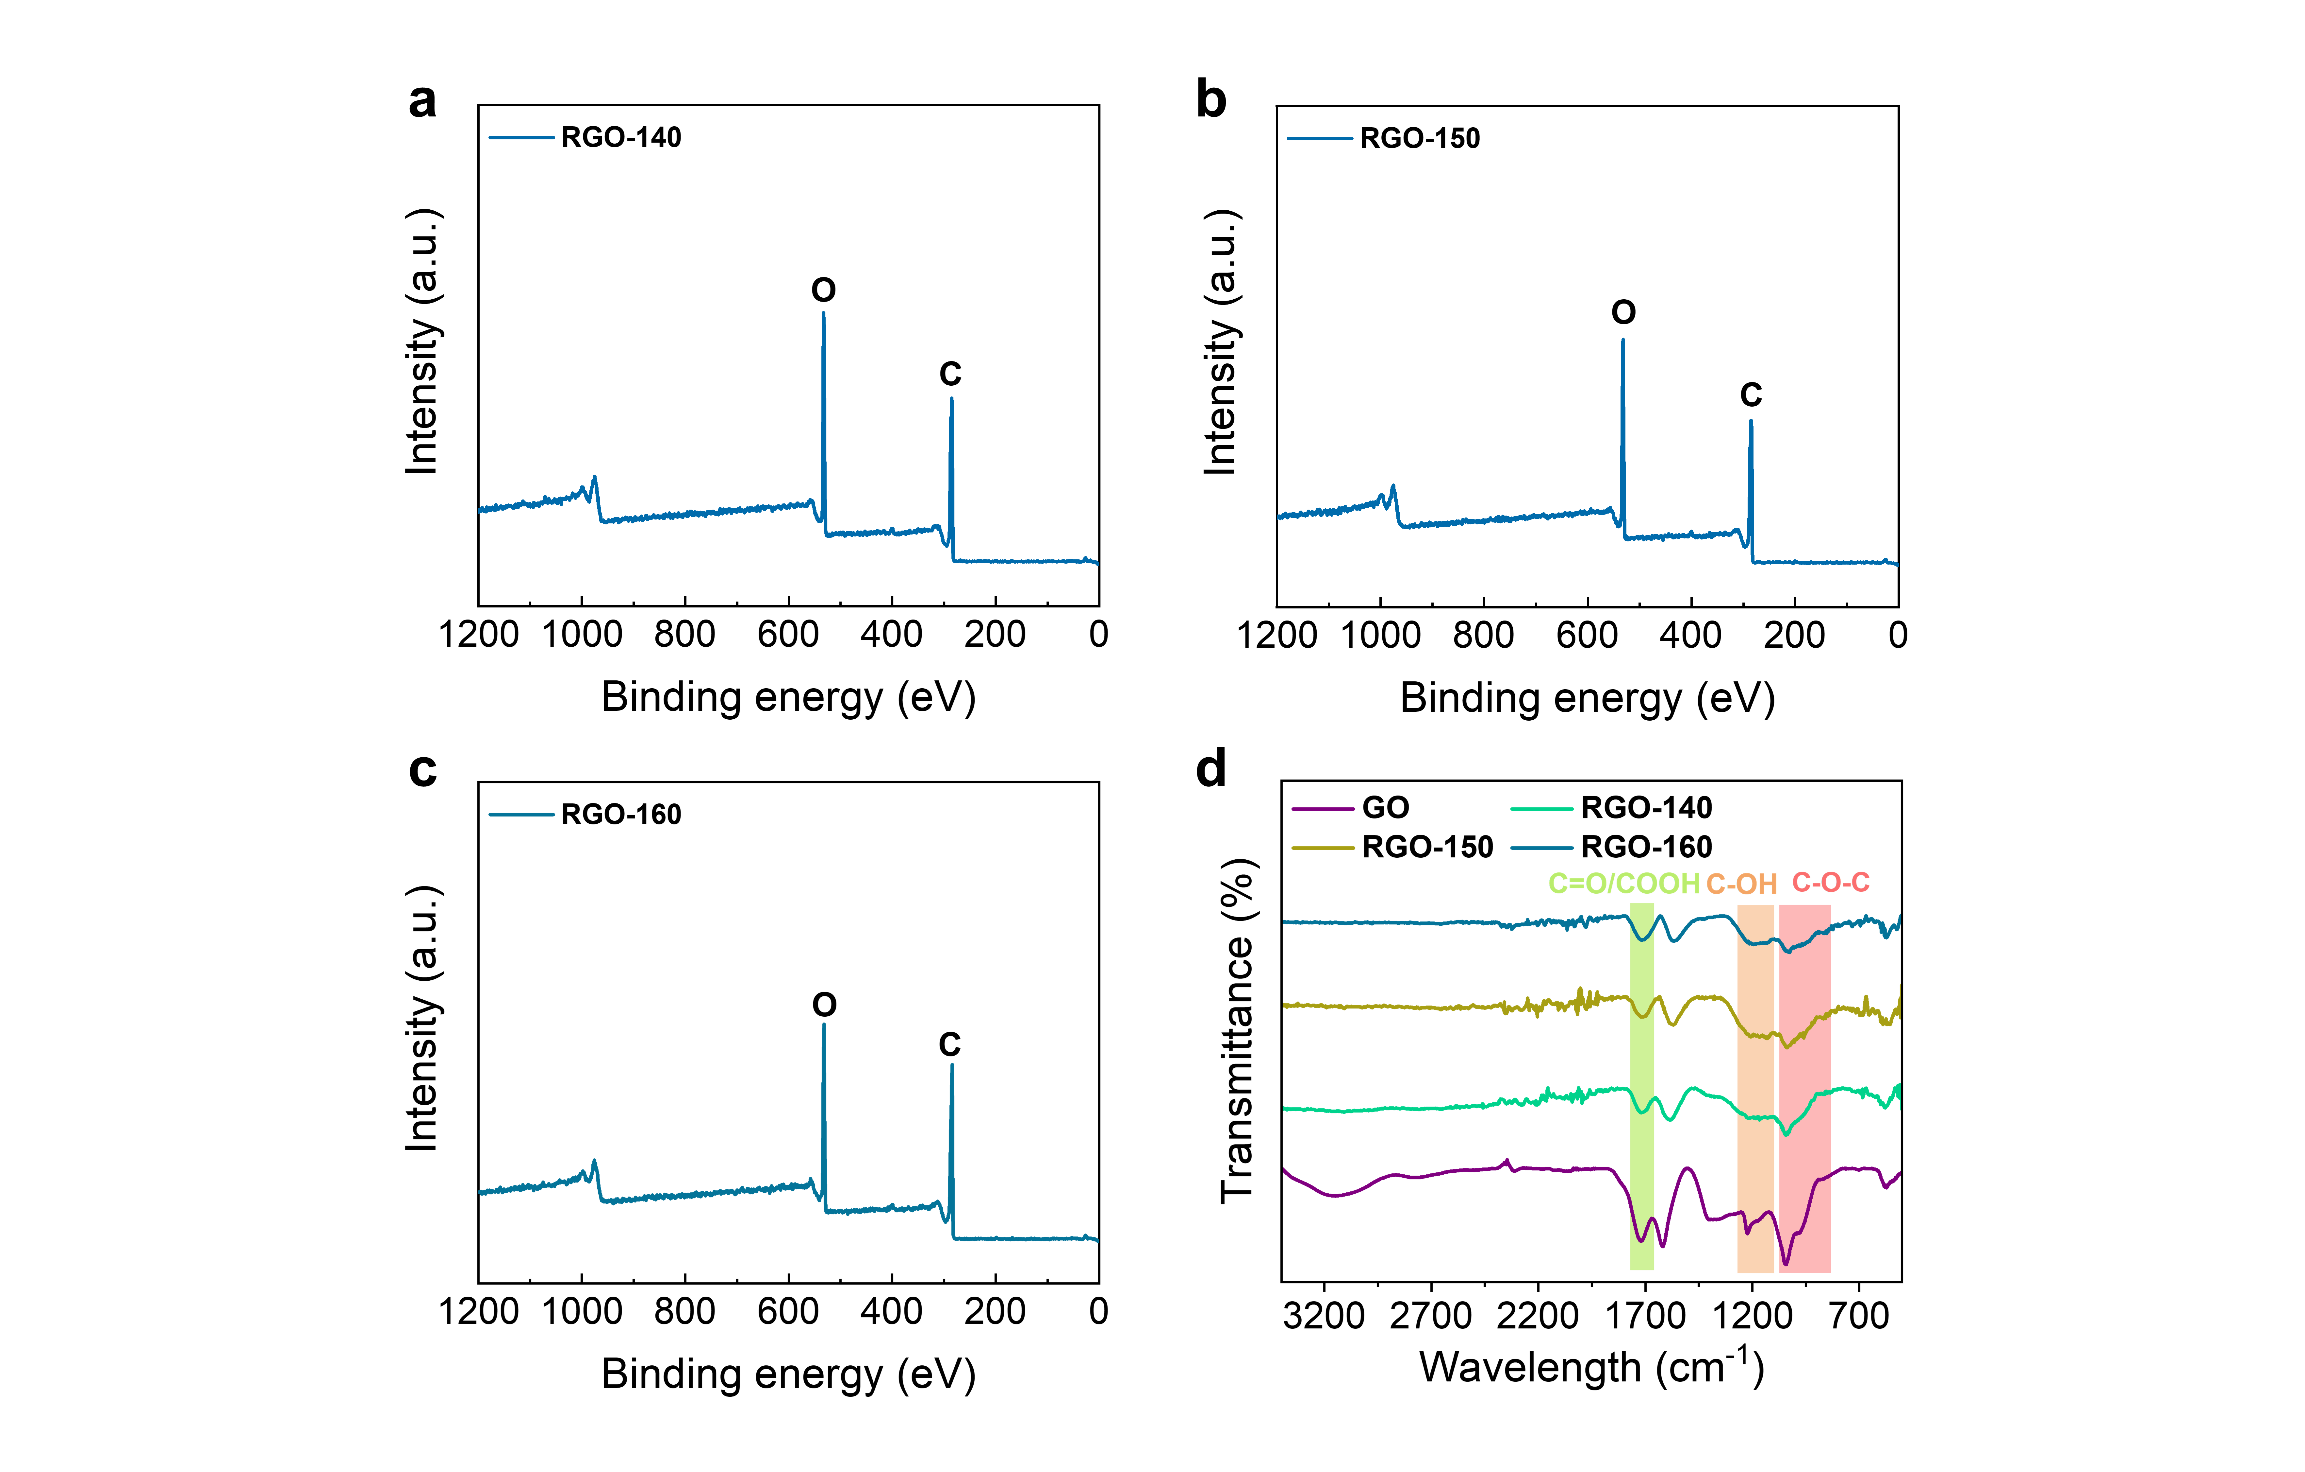


**Supplementary Figure 11. Characterization of O species on RGO-140, RGO-150 and RGO-160.** **(a**-**c)** XPS survey spectra of RGO-140, RGO-150 and RGO-160. **(d)** FT-IR spectra of RGO-140, RGO-150 and RGO-160.

**Supplementary Note 4:** The variations in the peaks at 1720 cm-1, 1223 cm-1, and 1042 cm-1 in the FT-IR spectra can be attributed to C=O/COOH, C-OH, and C-O-C[5](#_ENREF_5), respectively. In comparison to RGO-160, the O content of RGO-150 and RGO-140 increases successively, but there is no apparent pattern in the variation of OFGs.


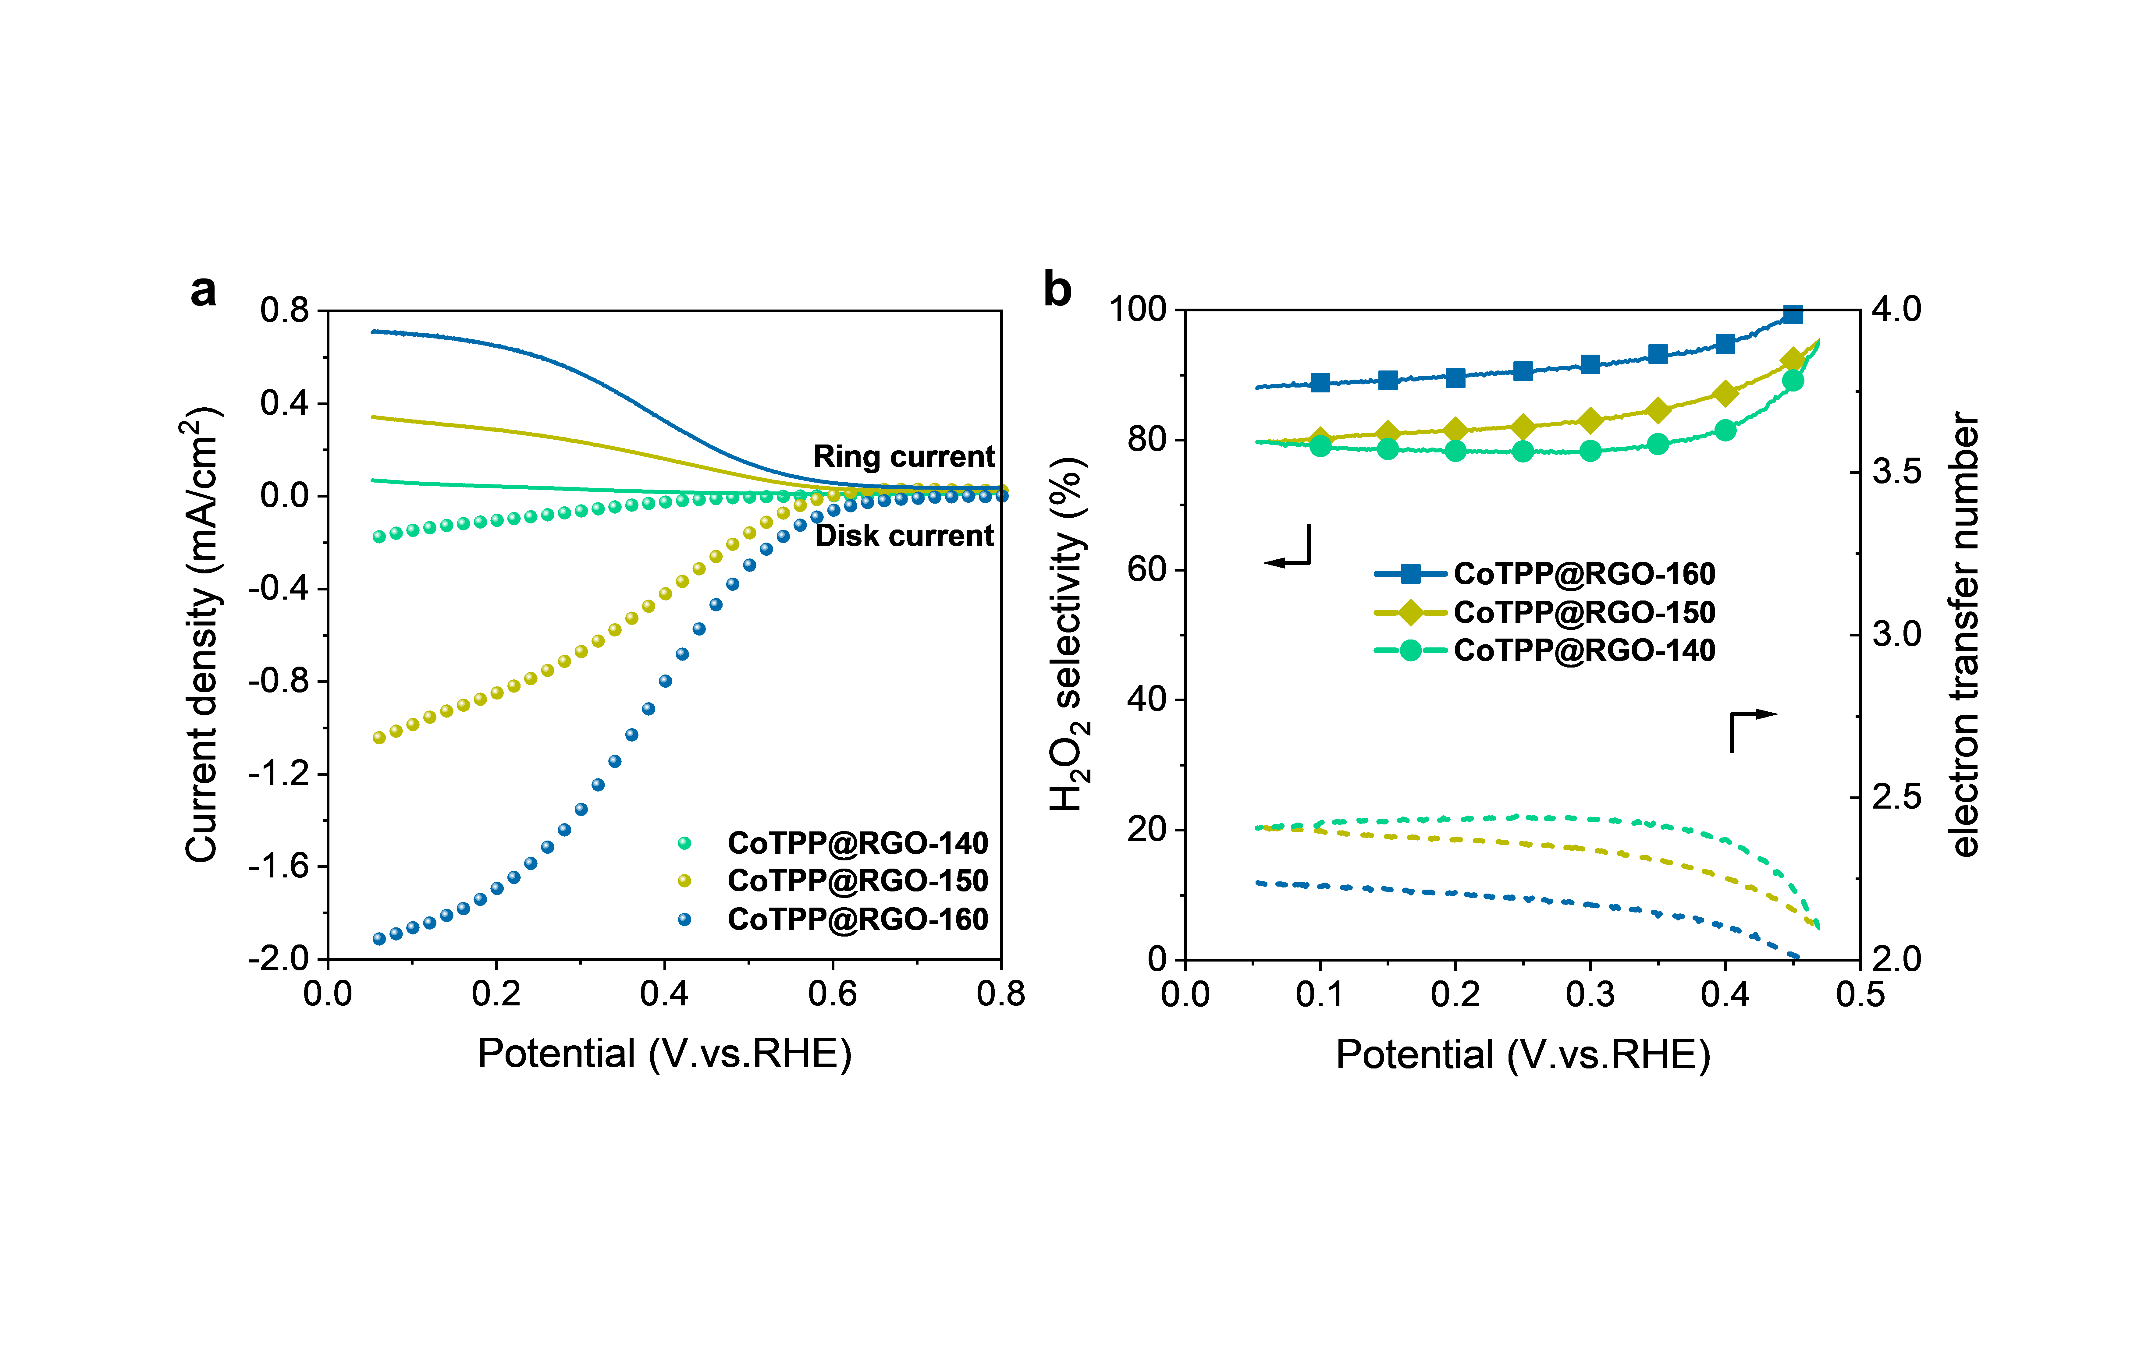


**Supplementary Figure 12. Comparison of ORR performance among CoTPP@RGO-140, CoTPP@RGO-150 and CoTPP@RGO-160 at 1600 r.p.m. in 0.5M H2SO4. (a)** LSV curves. **(b)** H2O2 selectivity and electron transfer number.


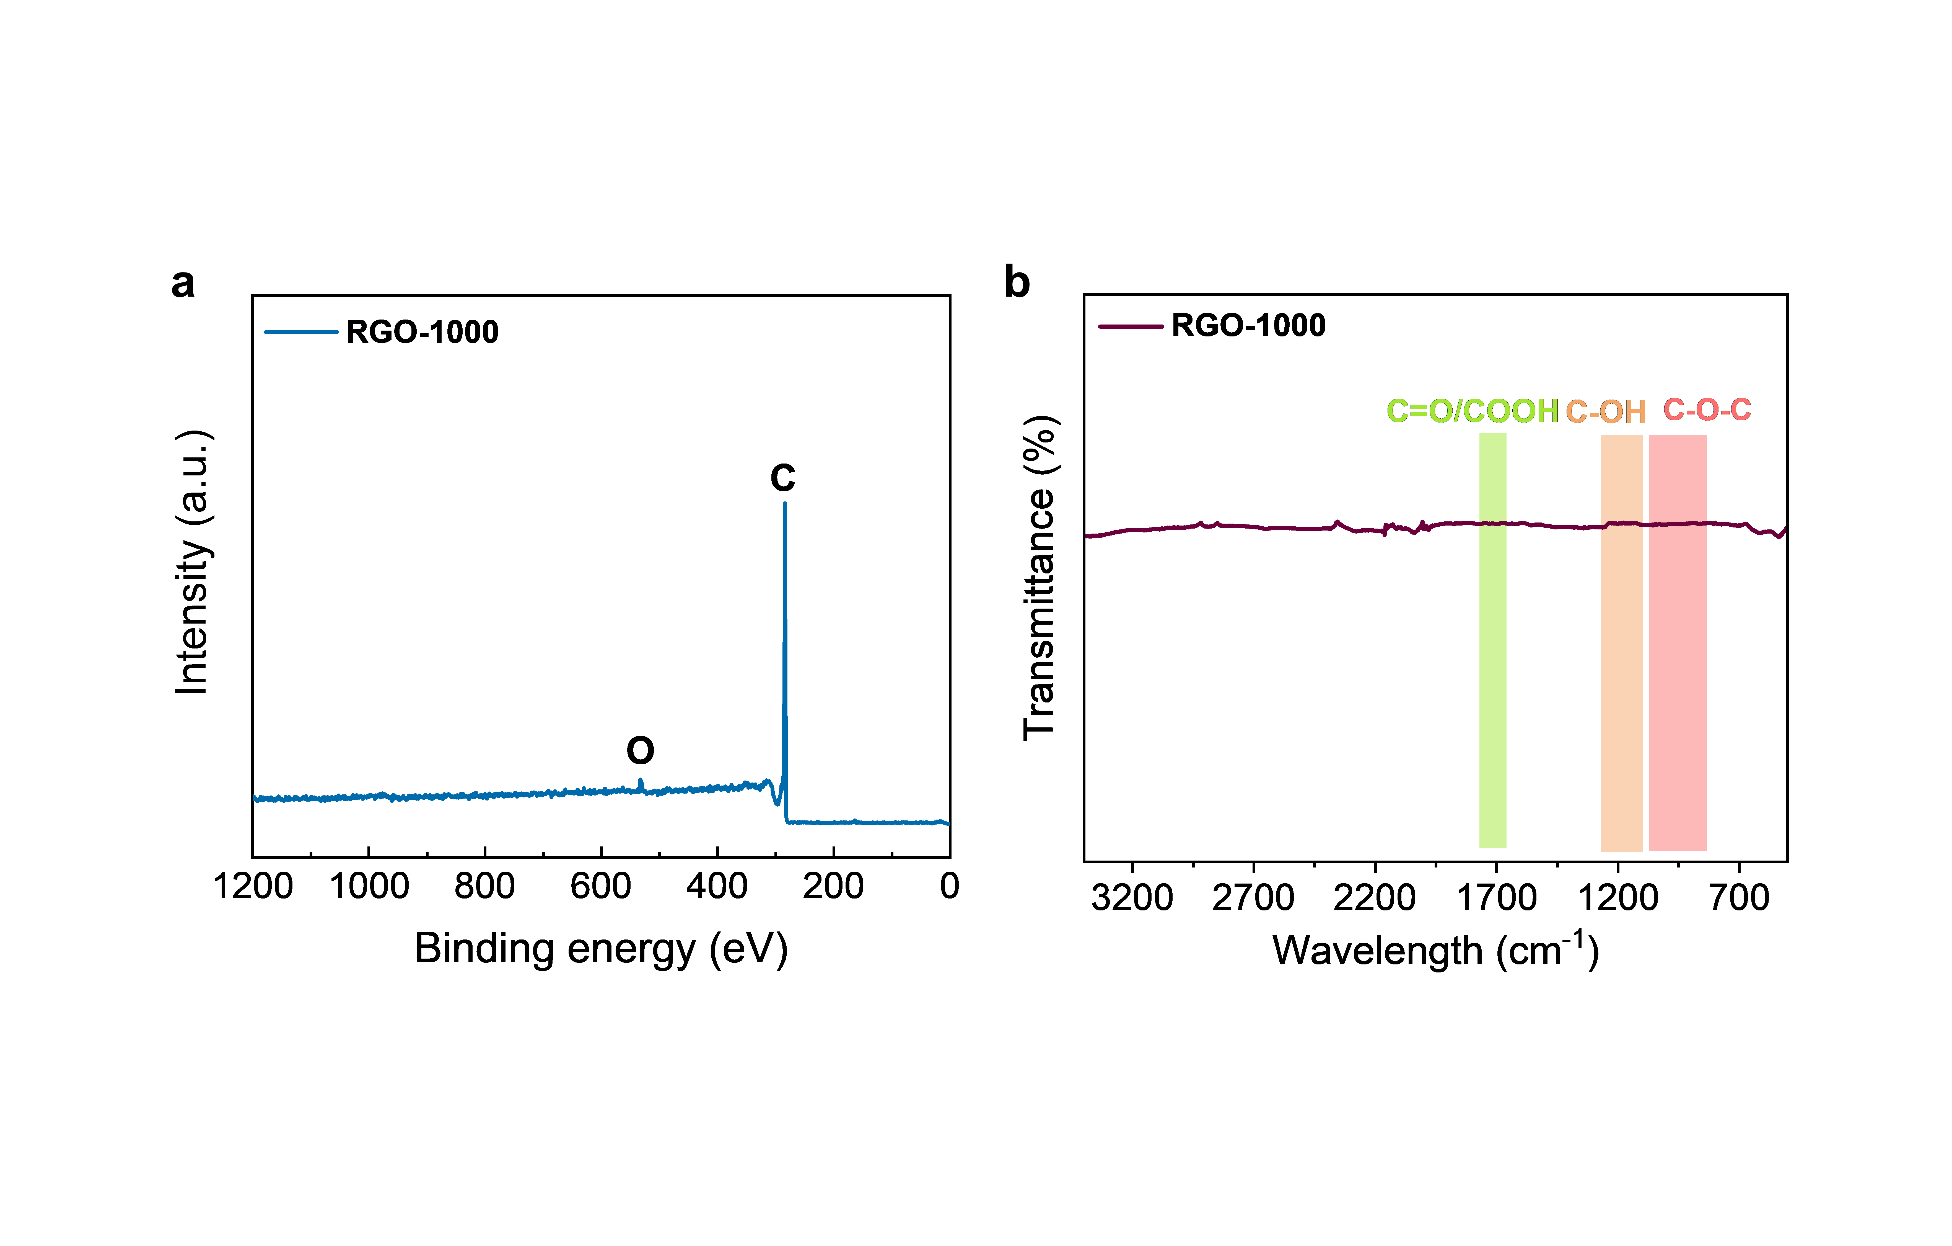


**Supplementary Figure 13. Characterization of O species on RGO-1000.** **(a)** a XPS survey spectrum of RGO-1000. **(b)** a FT-IR spectrum of RGO-1000. It is evident that there are few O species in RGO-1000, thus it can be considered as pure graphene. The reason for not using natural graphene is to eliminate the interference of defects.


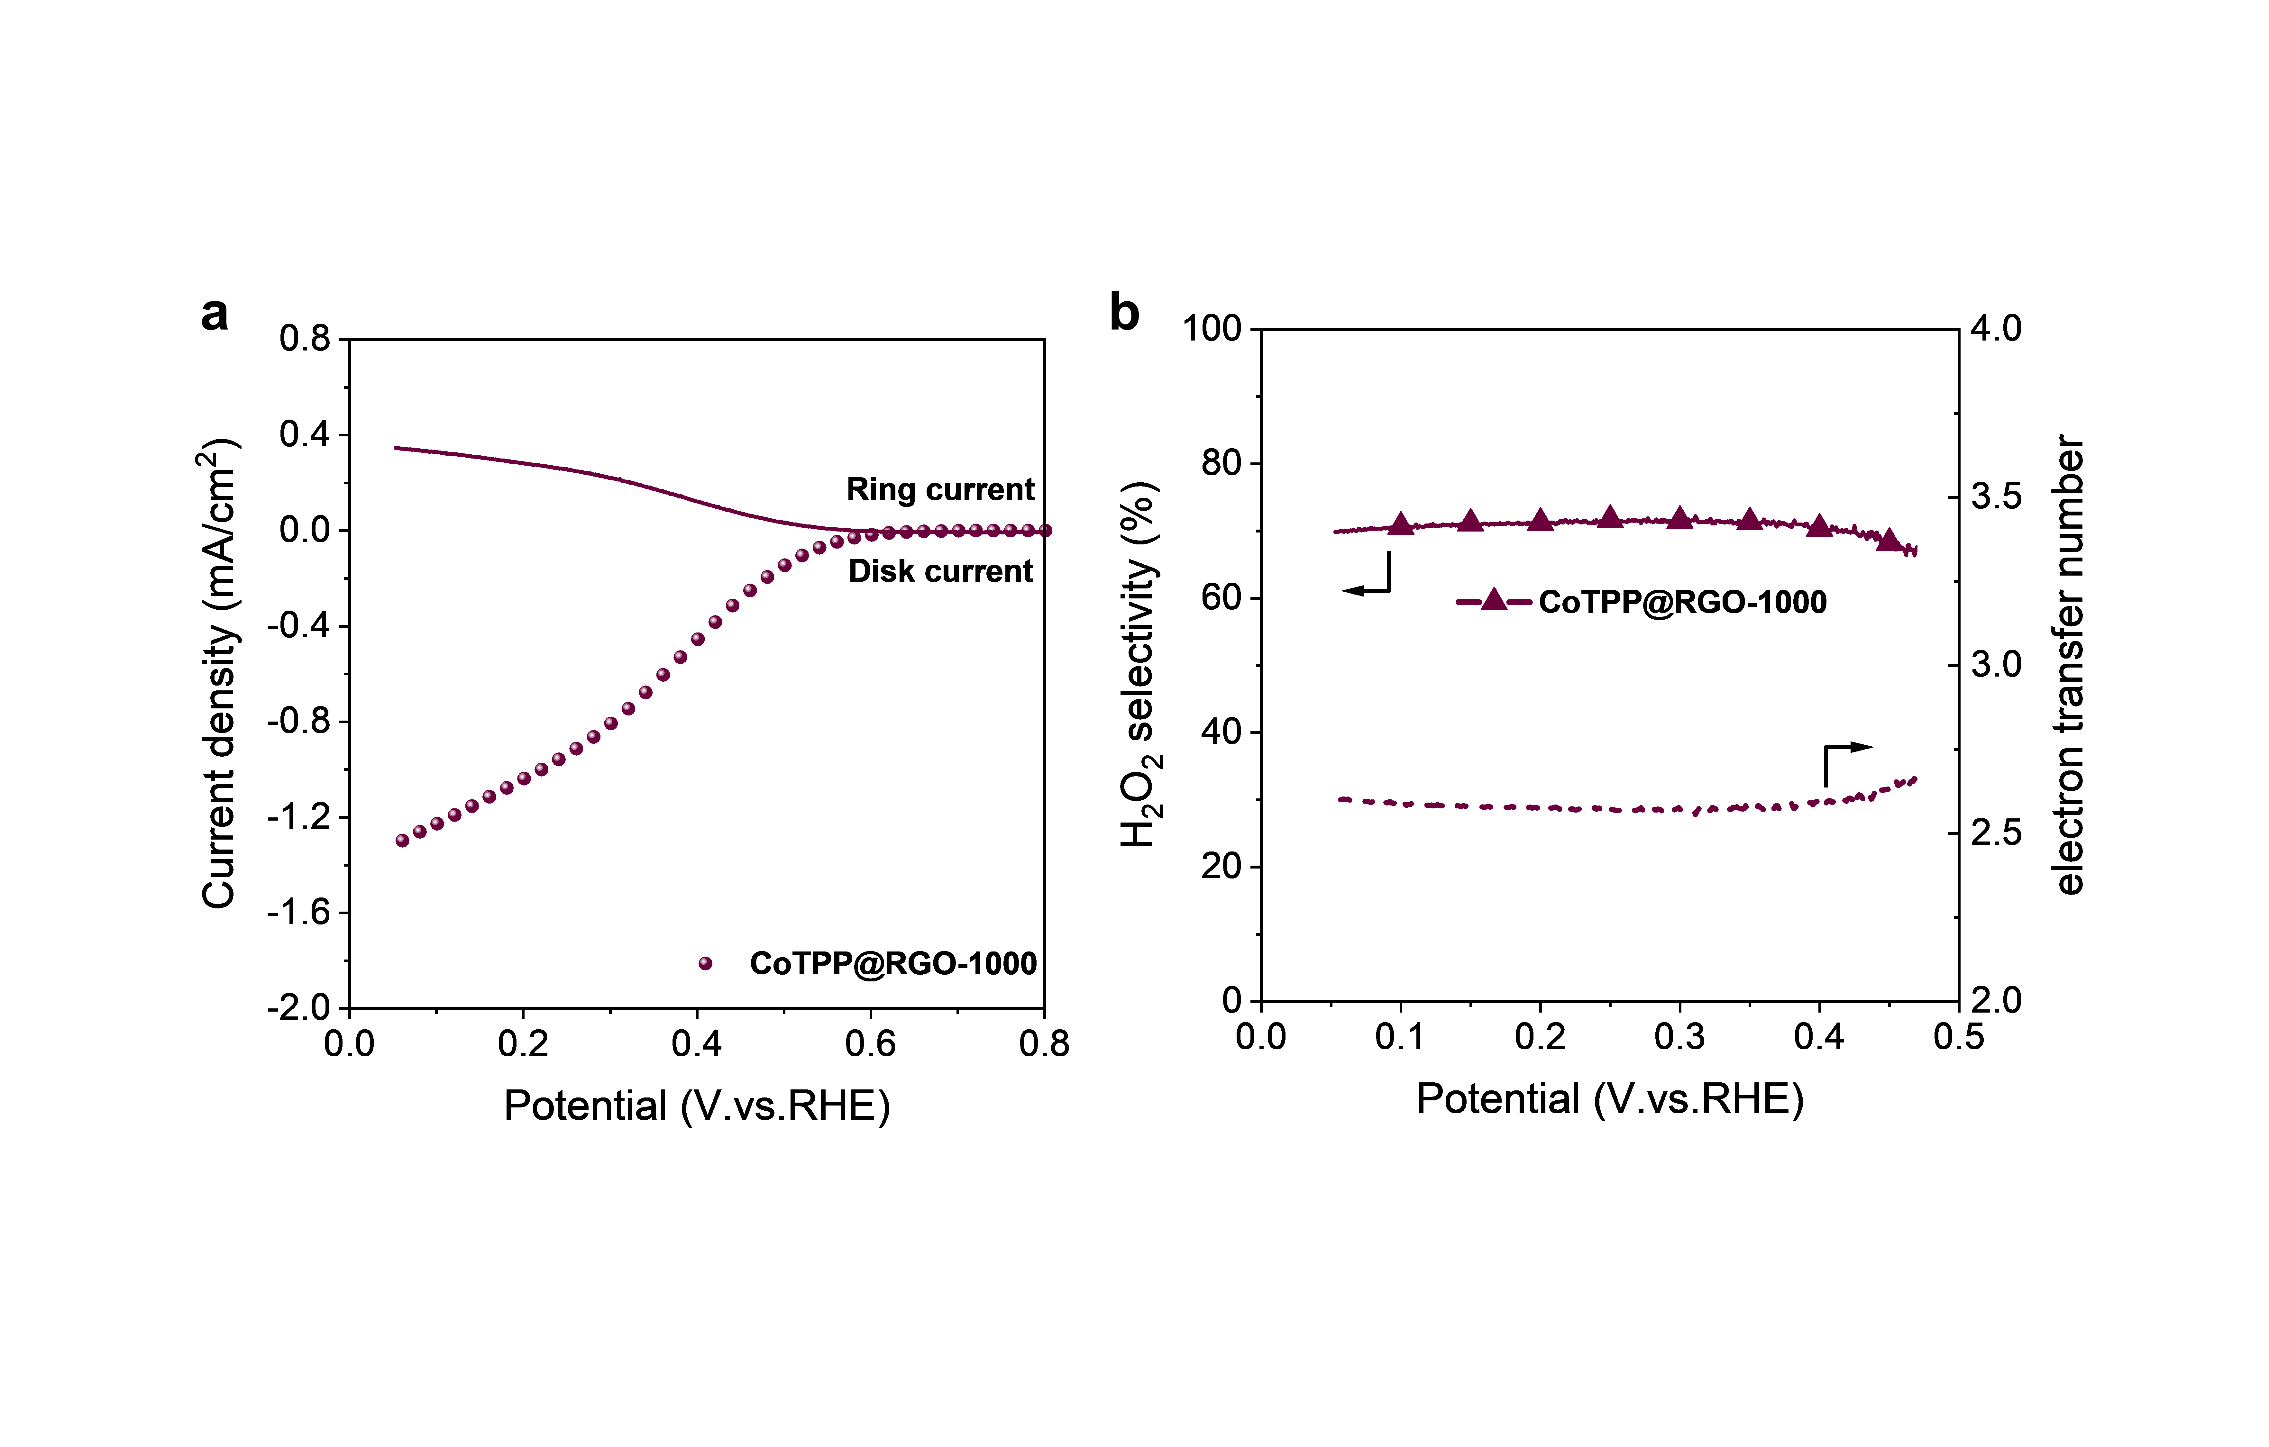


**Supplementary Figure 14. The ORR performance on the CoTPP@RGO-1000 catalyst at 1600 r.p.m. in 0.5M H2SO4. (a)** LSV curves. **(b)** H2O2 selectivity and electron transfer number.


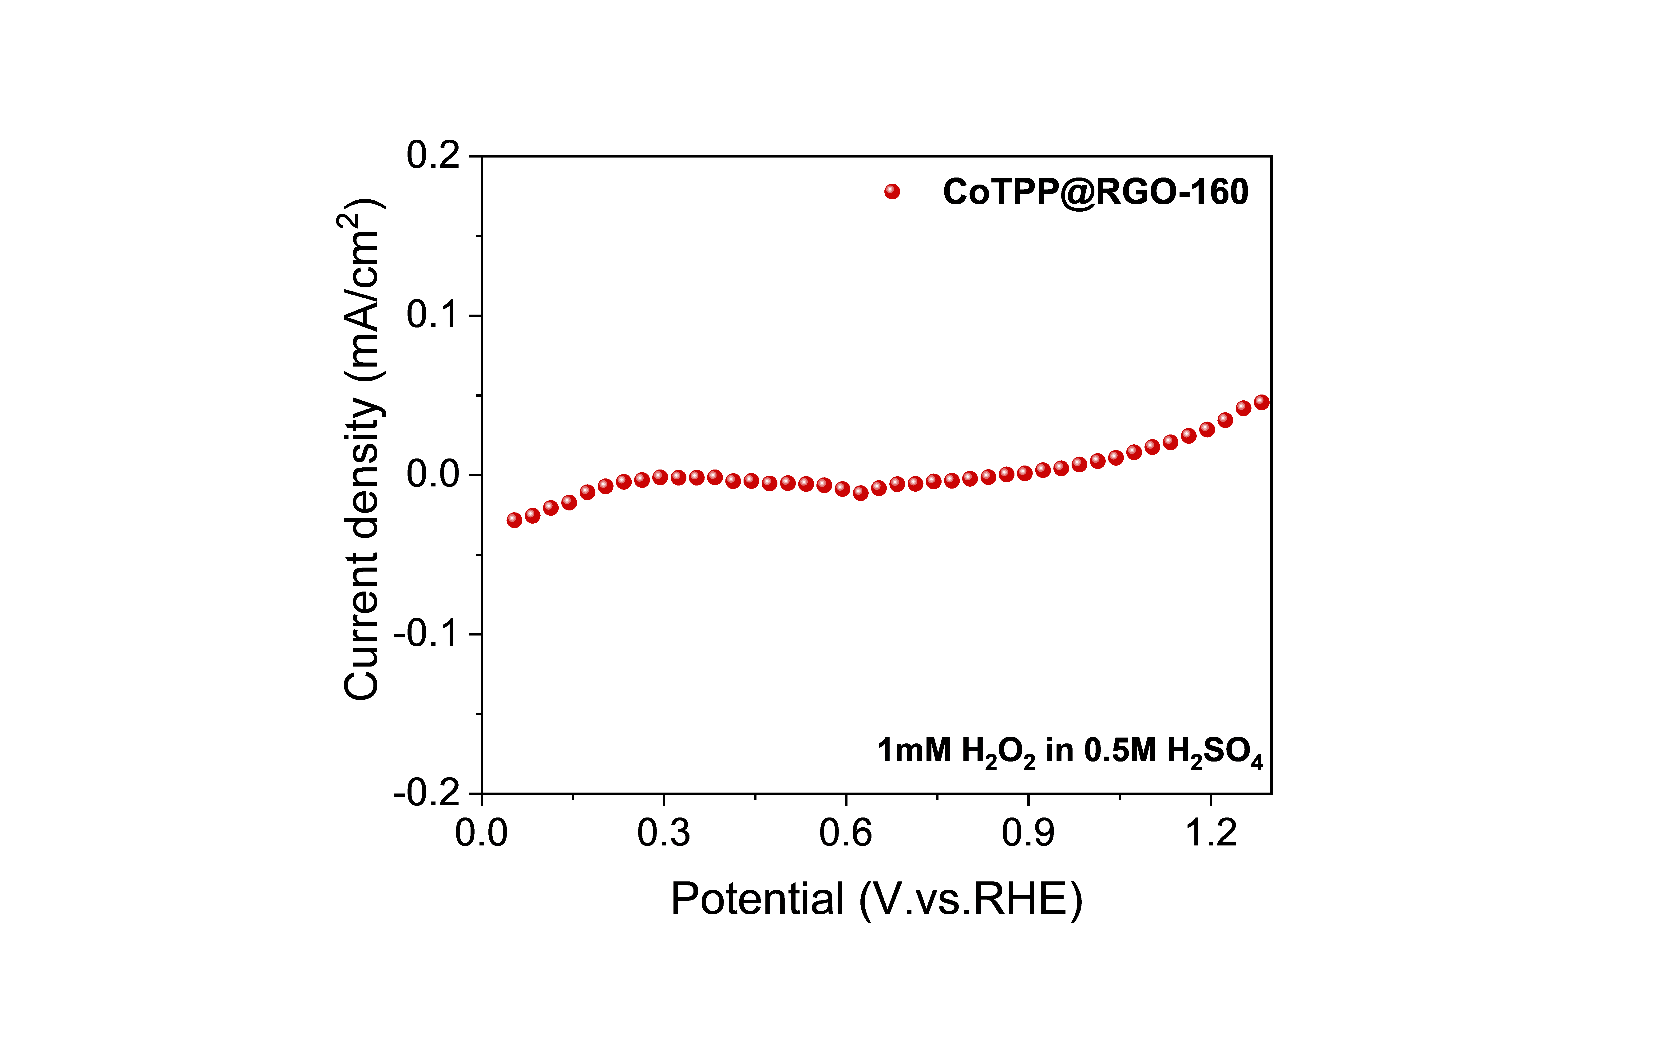


**Supplementary Figure 15. H2O2 reduction reaction (HpRR) for the CoTPP@RGO-160 catalyst on RRDE at 1600 r.p.m.**


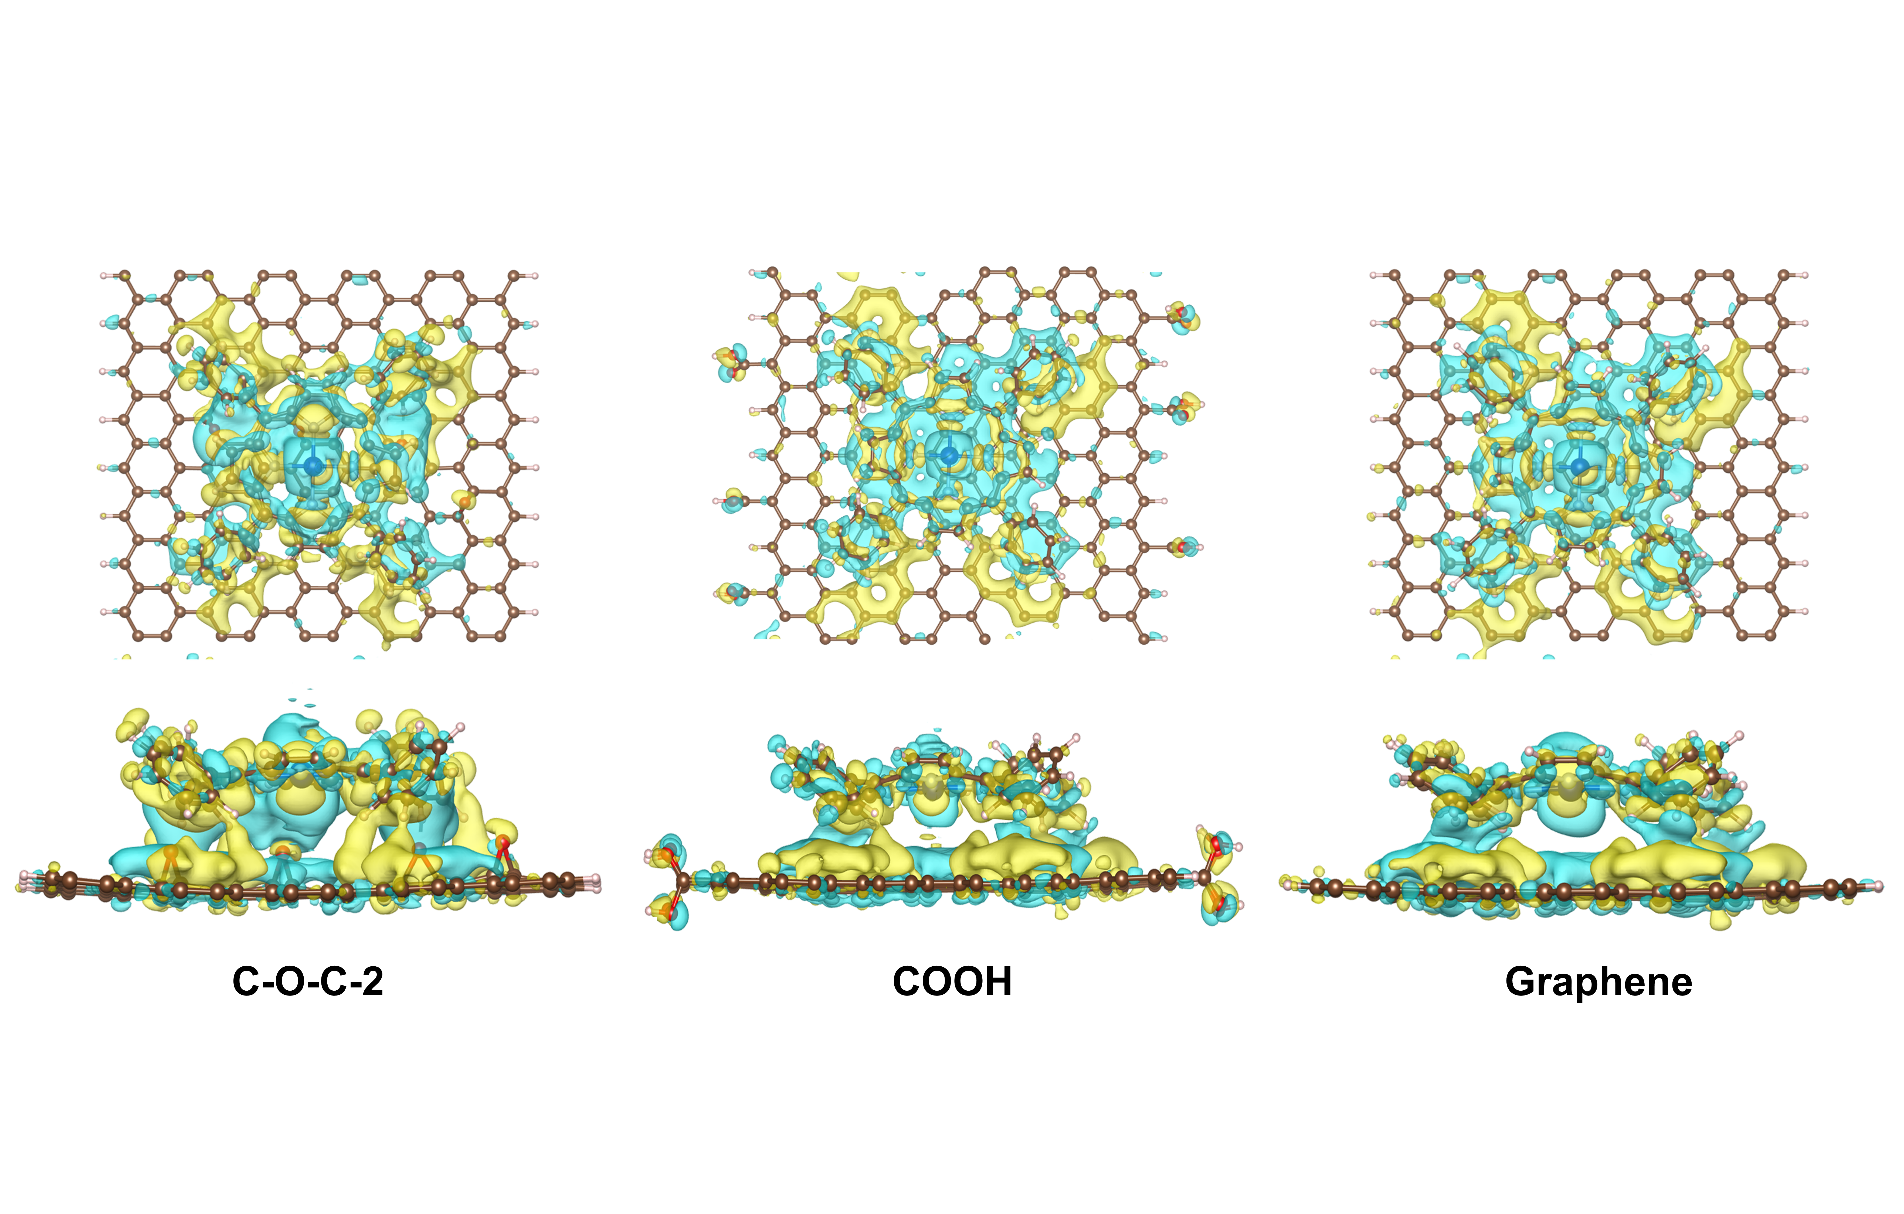


**Supplementary Figure 16. Bader charge:** The top view and side view of the CoTPP molecular and RGO carrier of Co-N4/C-O-C, Co-N4/COOH and Co-N4/Graphene configurations. Yellow and cyan isosurfaces represent the electron-accumulation and depletion, respectively.

**Supplementary Note 5:** In order to theoretically comprehend the long-range mode, Bader charges of both CoTPP molecules and the RGO carriers were simultaneously depicted to explore their correlation. It can be observed that these two entities consistently change in tandem. The Bader charge of RGO is represented by the average Bader charge of all carbon atoms on RGO. Through comparing it with the Bader charge of Co, the correlation of their variations can be quantitatively demonstrated. The results are shown in Figure 3g.


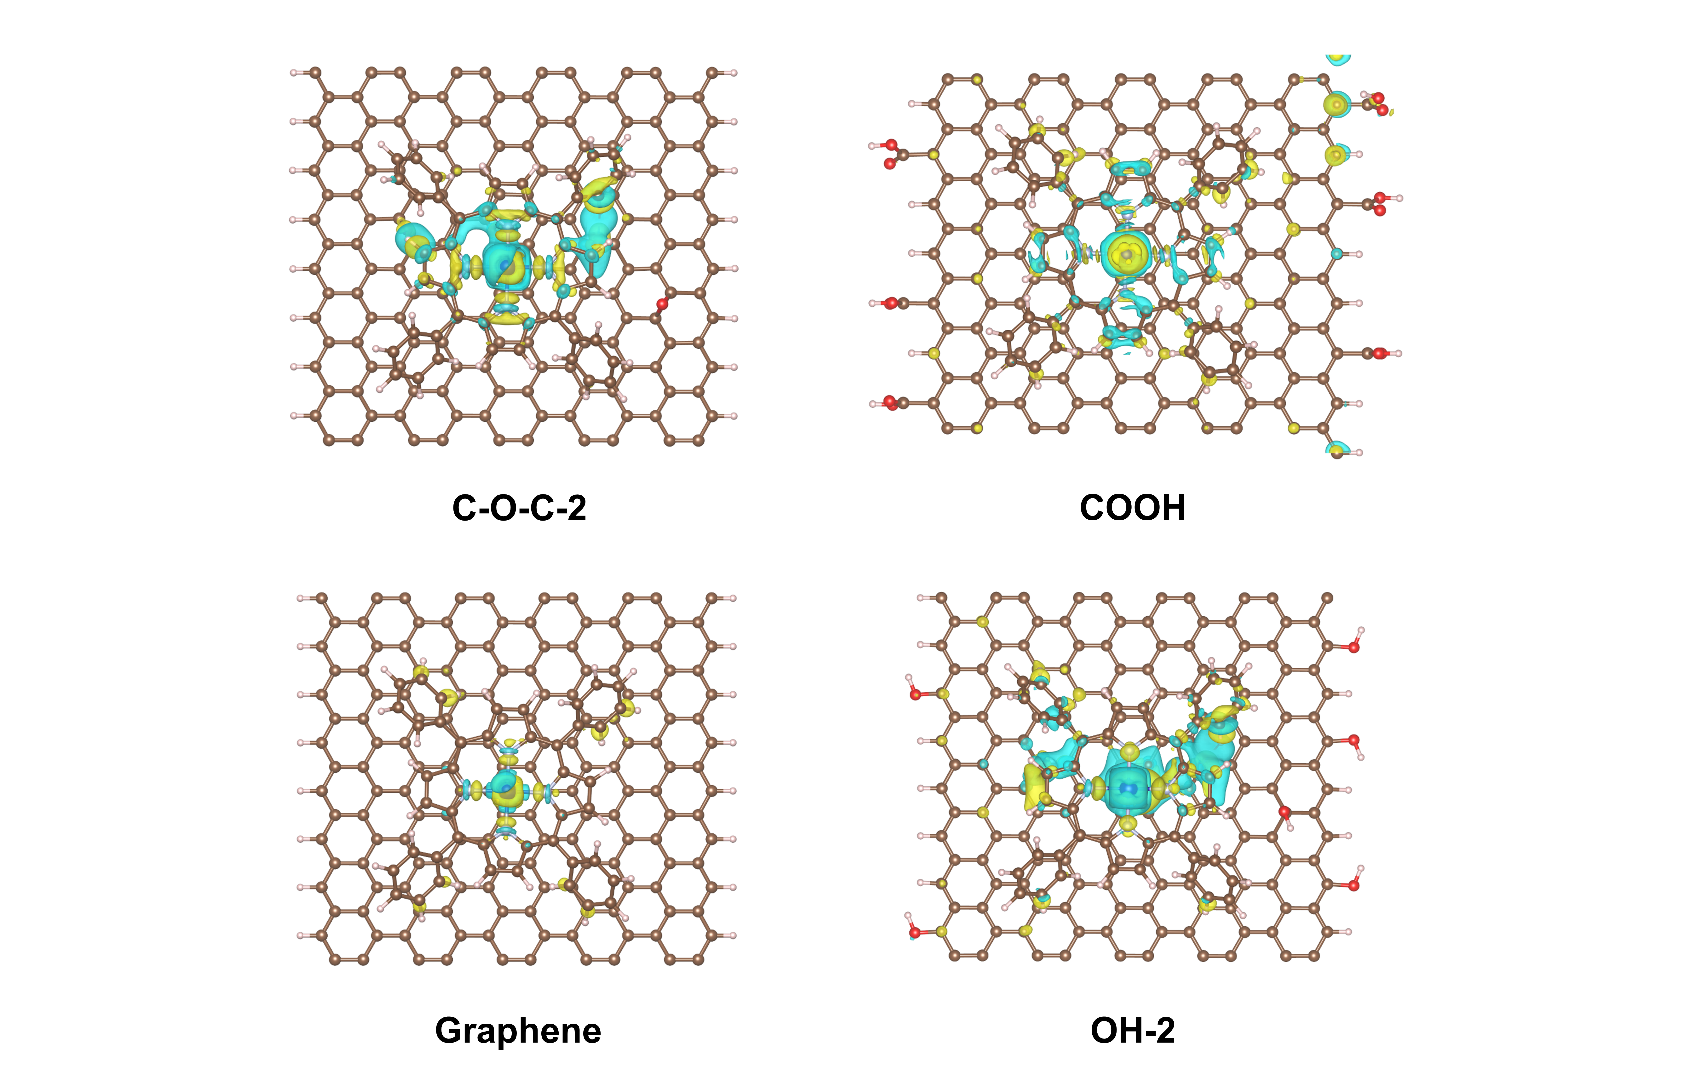


**Supplementary Figure 17. Bader charge:** The top view of the CoTPP molecular of Co-N4/C-O-C, Co-N4/COOH, Co-N4/Graphene and Co-N4/OH configurations. Yellow and cyan isosurfaces represent the electron-accumulation and depletion, respectively.


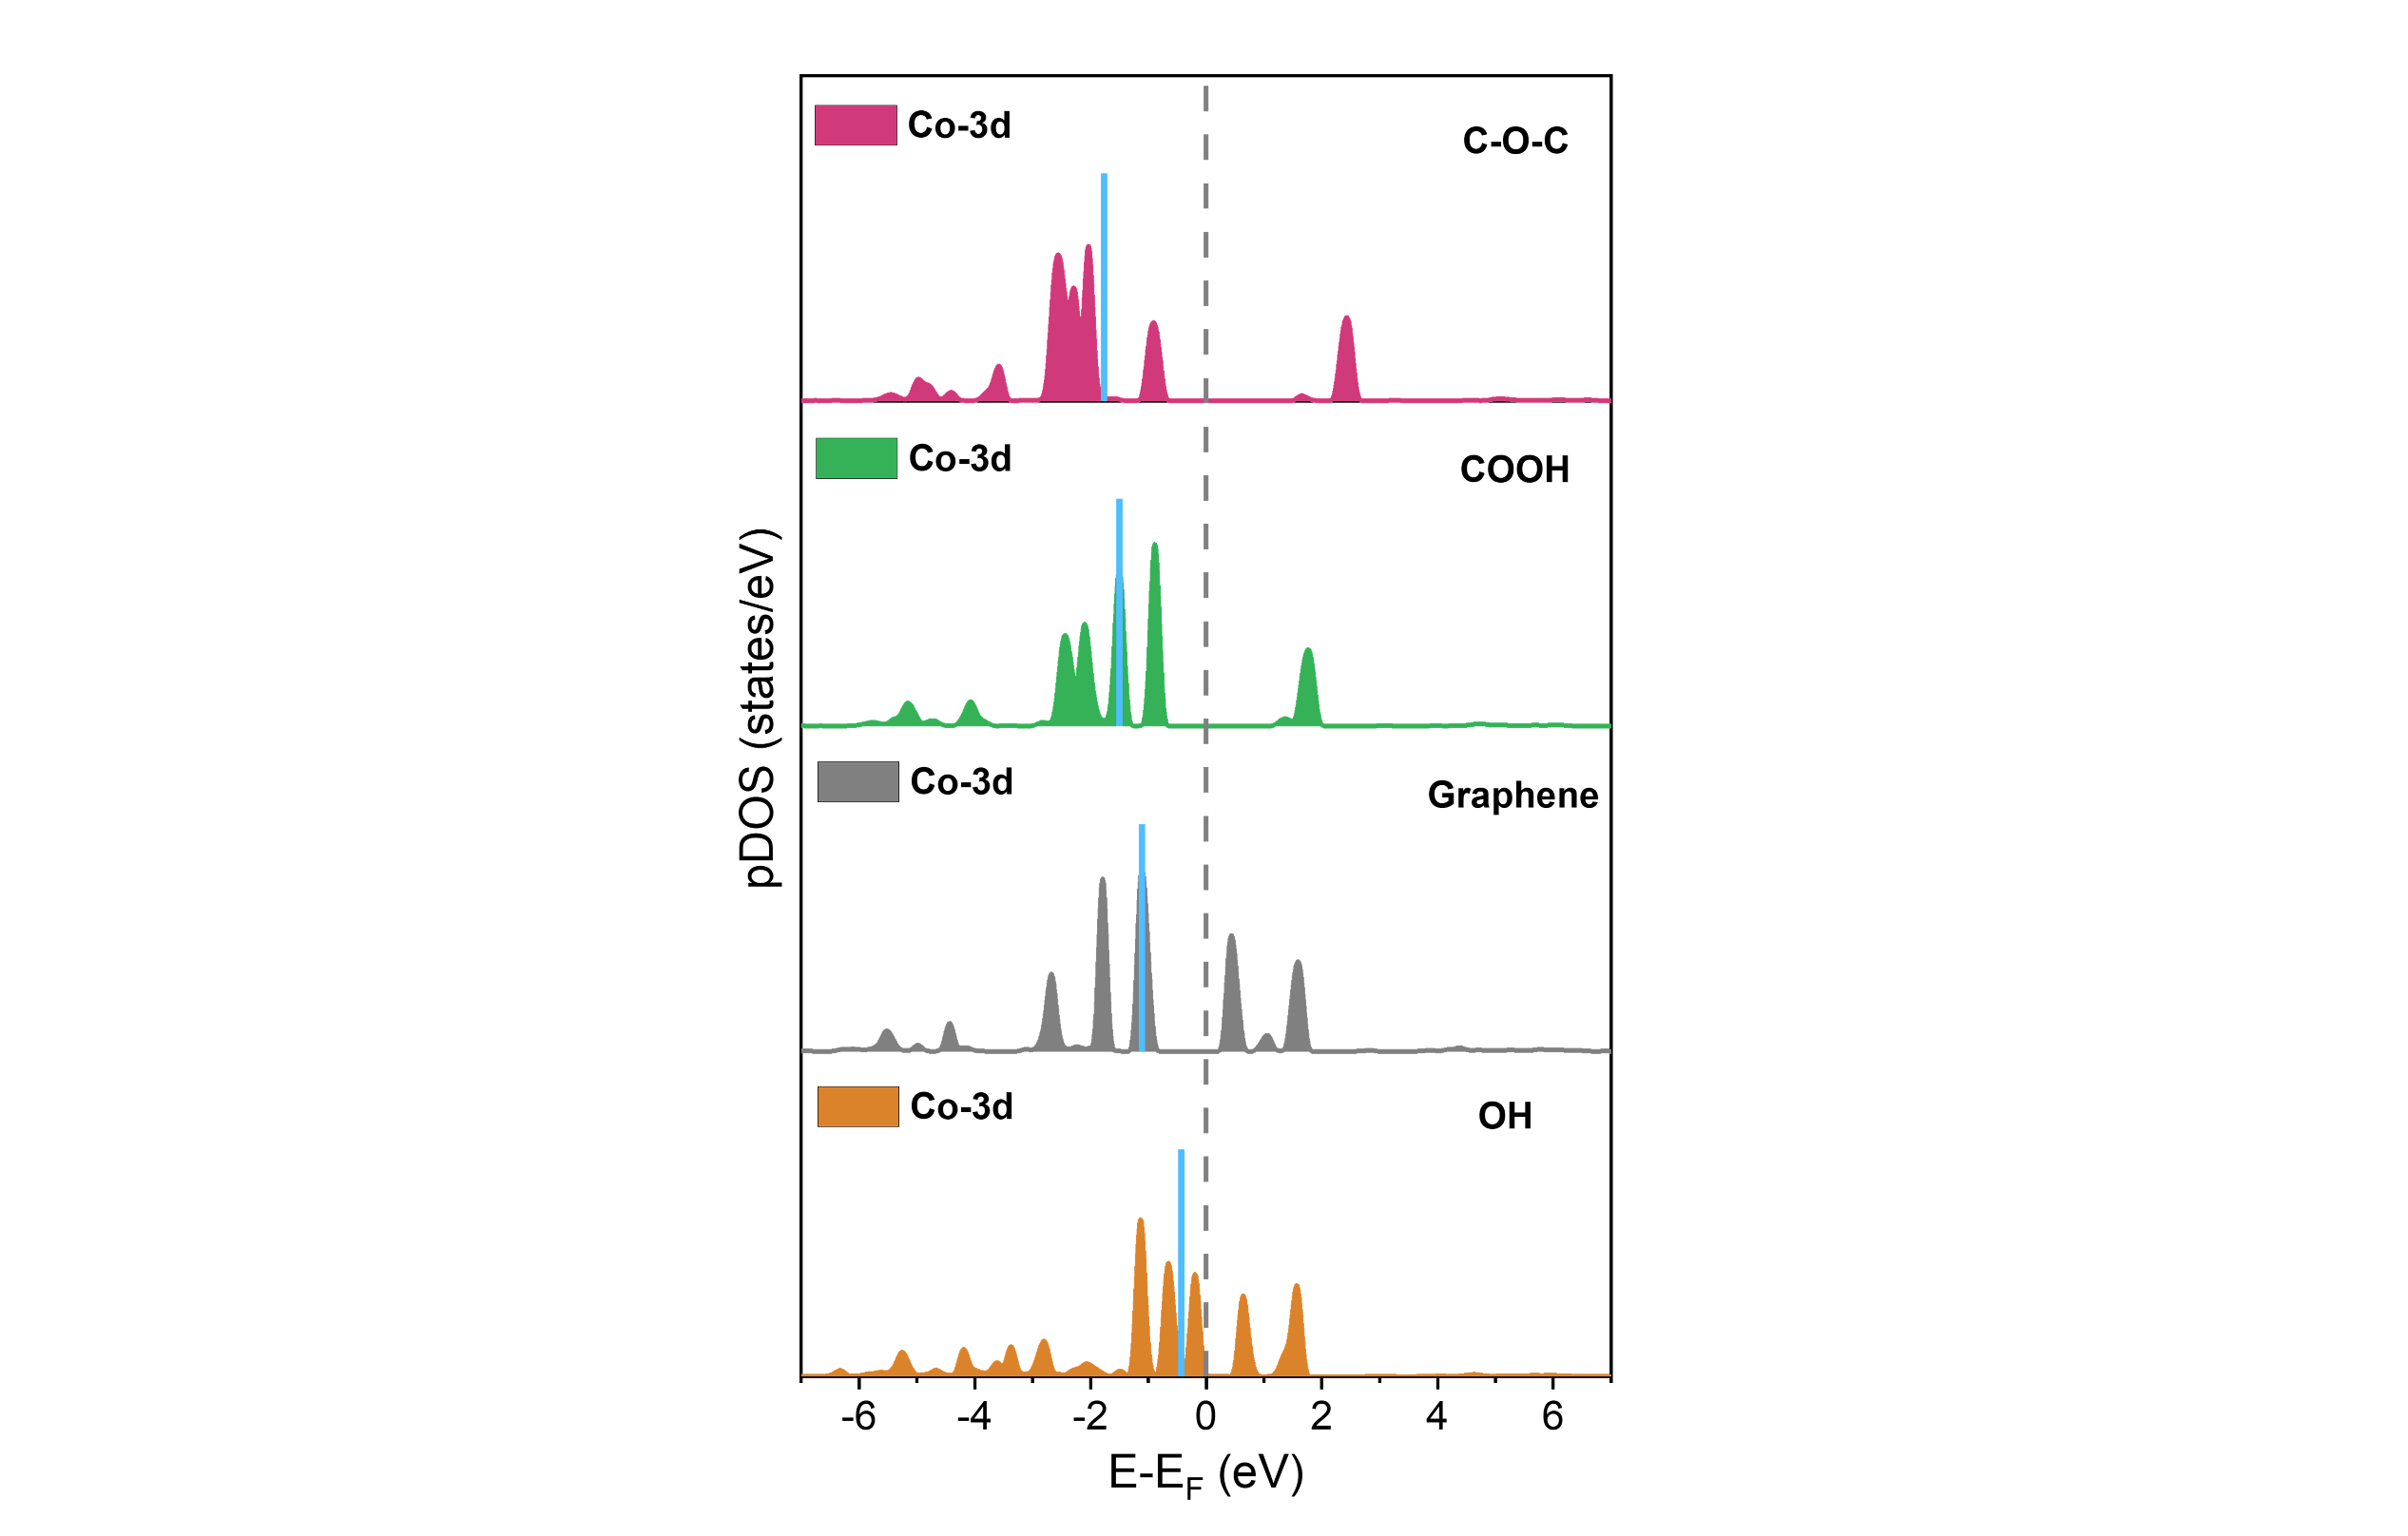


**Supplementary Figure 18. Projected density of states (pDOS) for d-orbitals of Co atoms of Co-N4/C-O-C, Co-N4/COOH, Co-N4/Graphene and Co-N4/OH configurations.** The blue lines mark the positions of d-band center.


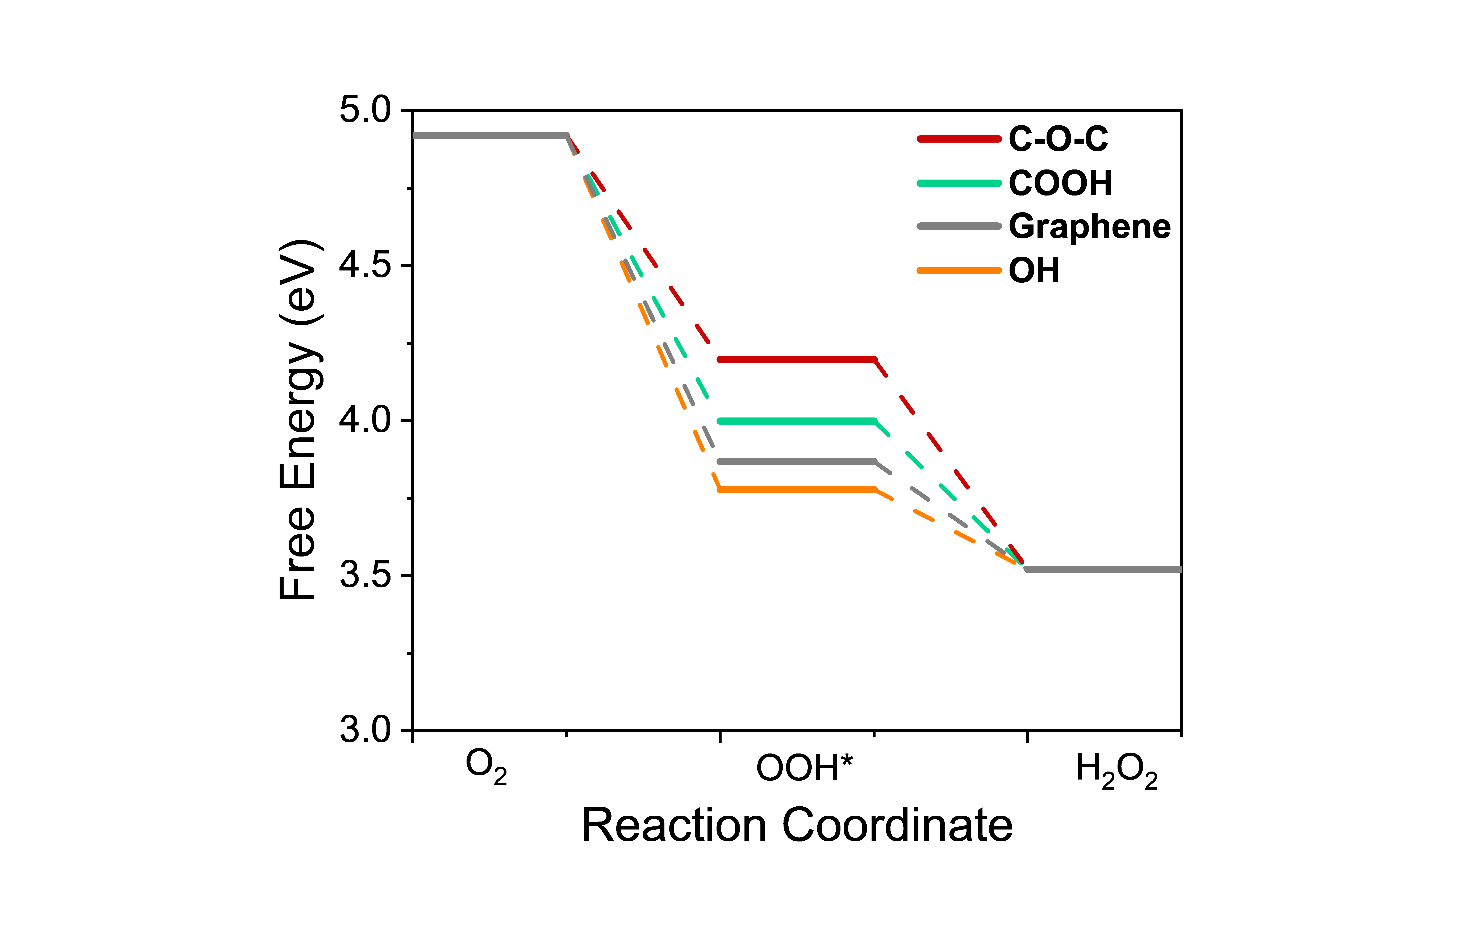


**Supplementary Figure 19. Calculated free-energy diagram for 2e- ORR process.** The 2e-ORR processes for all configurations are spontaneous. The energy variation for each step can be inferred from the above diagram.


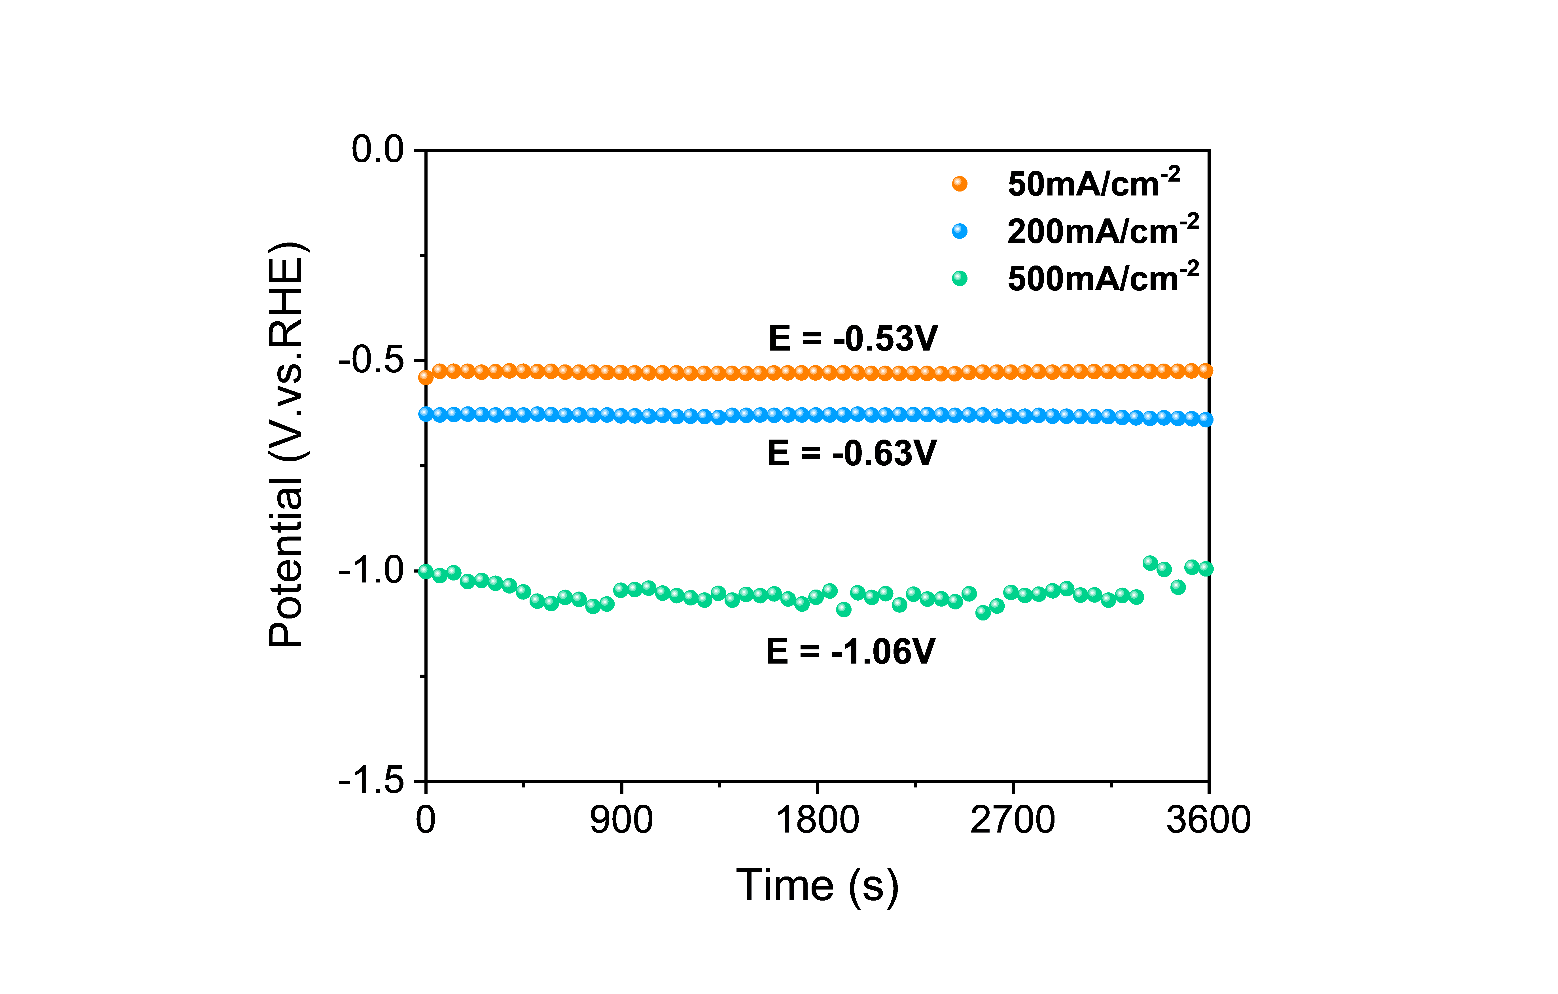


**Supplementary Figure 20. The galvanostatic electrolysis under current densities of 50, 200, and 500 mA cm-2.** The corresponding potential is determined by taking the average value of all data points.


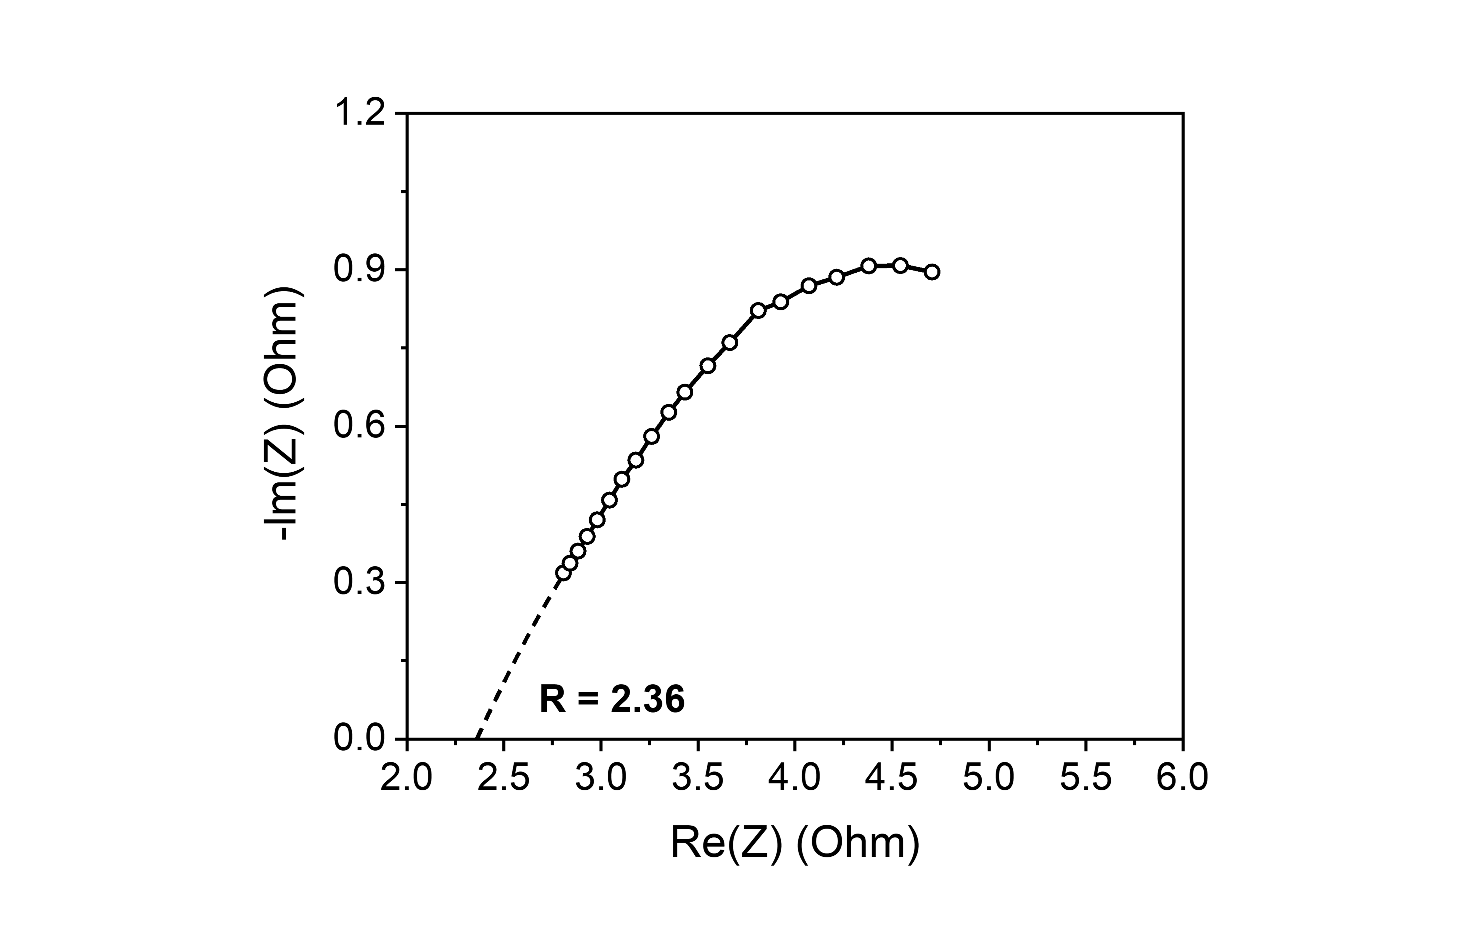


**Supplementary Figure 21. EIS profiles of the cathode catalyst in flow cell.** The intersection of the curve/extended line with the X-axis represents the ohmic resistance.


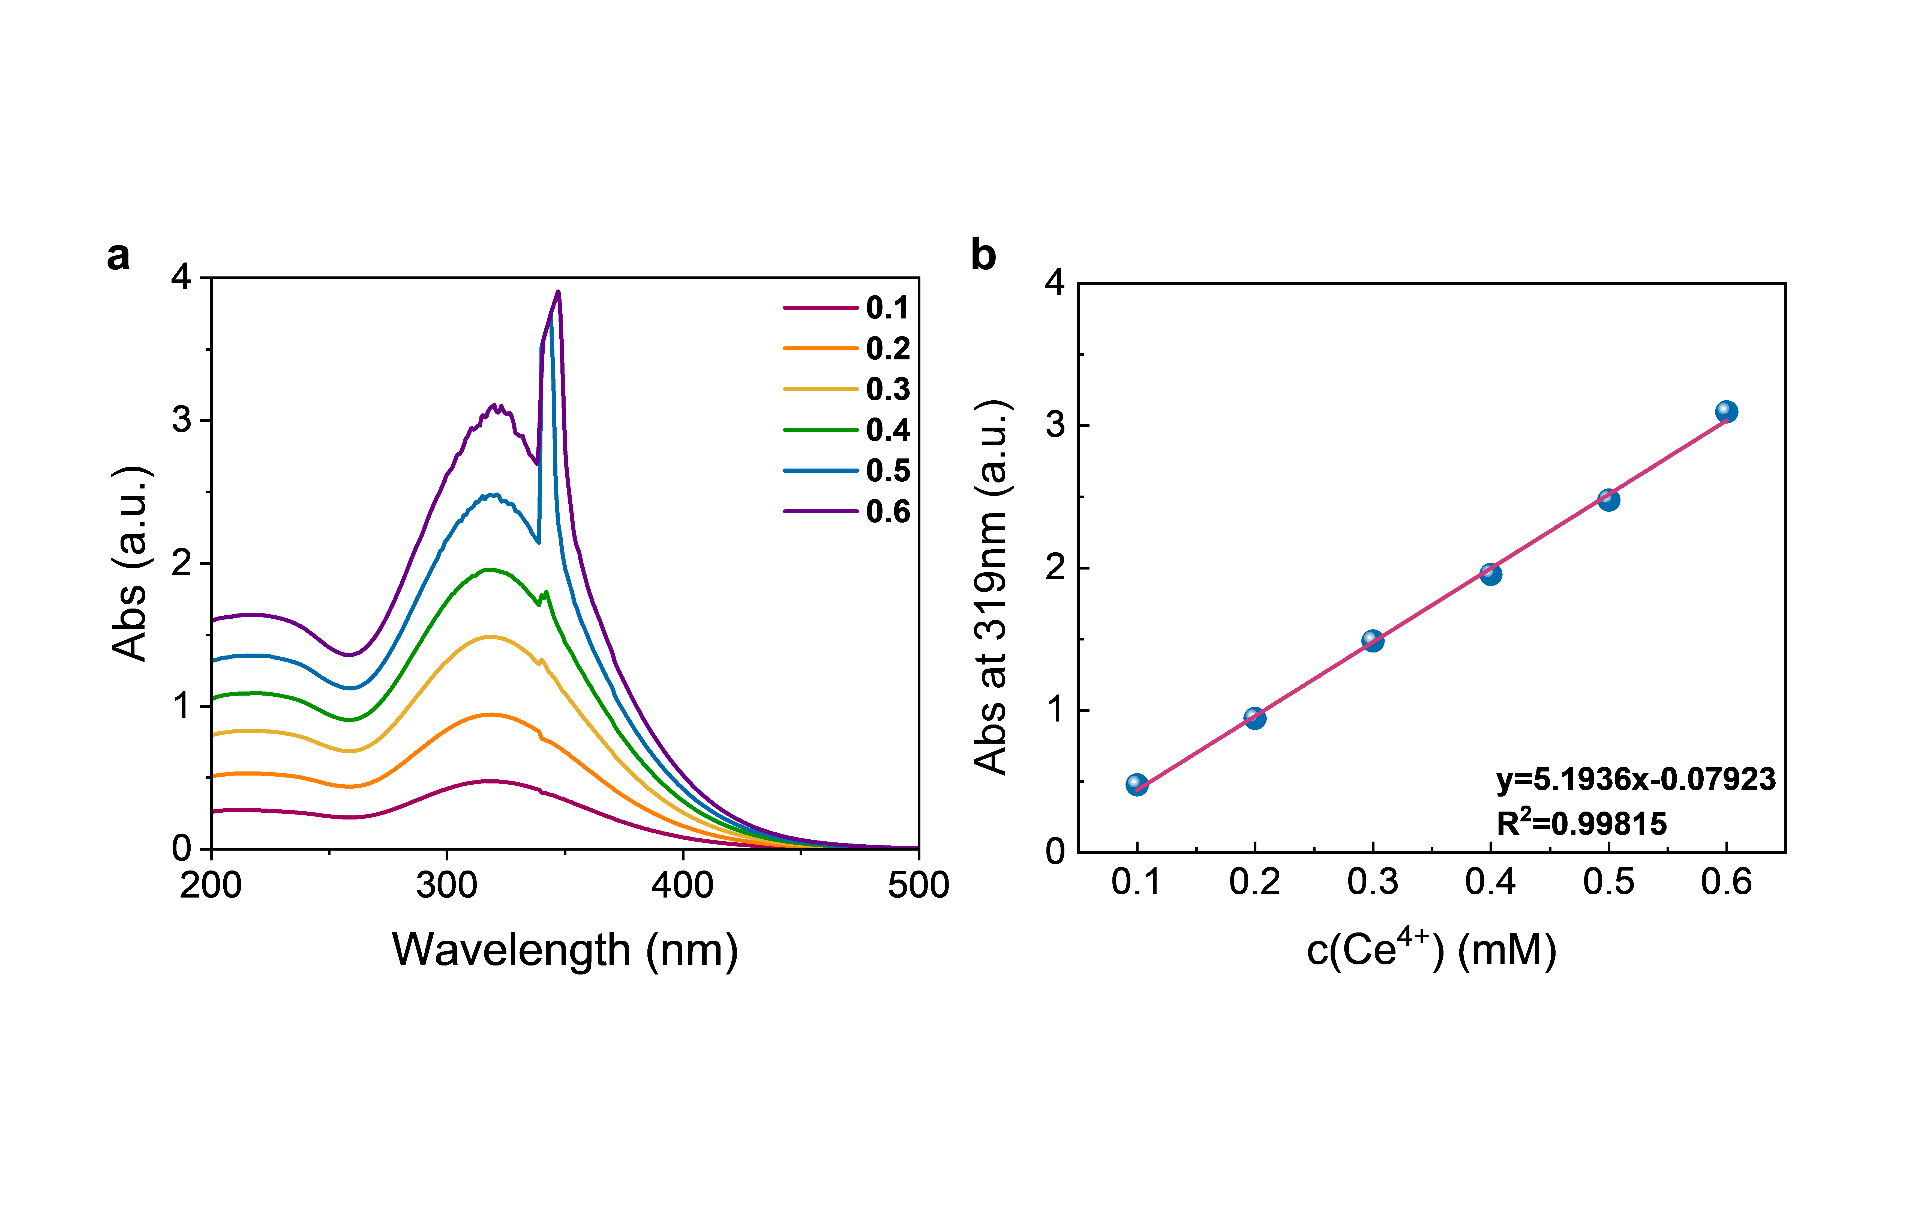


**Supplementary Figure 22. (a) UV-Vis spectra of different concentrations of Ce4+ and (b) the corresponding calibration curve.**


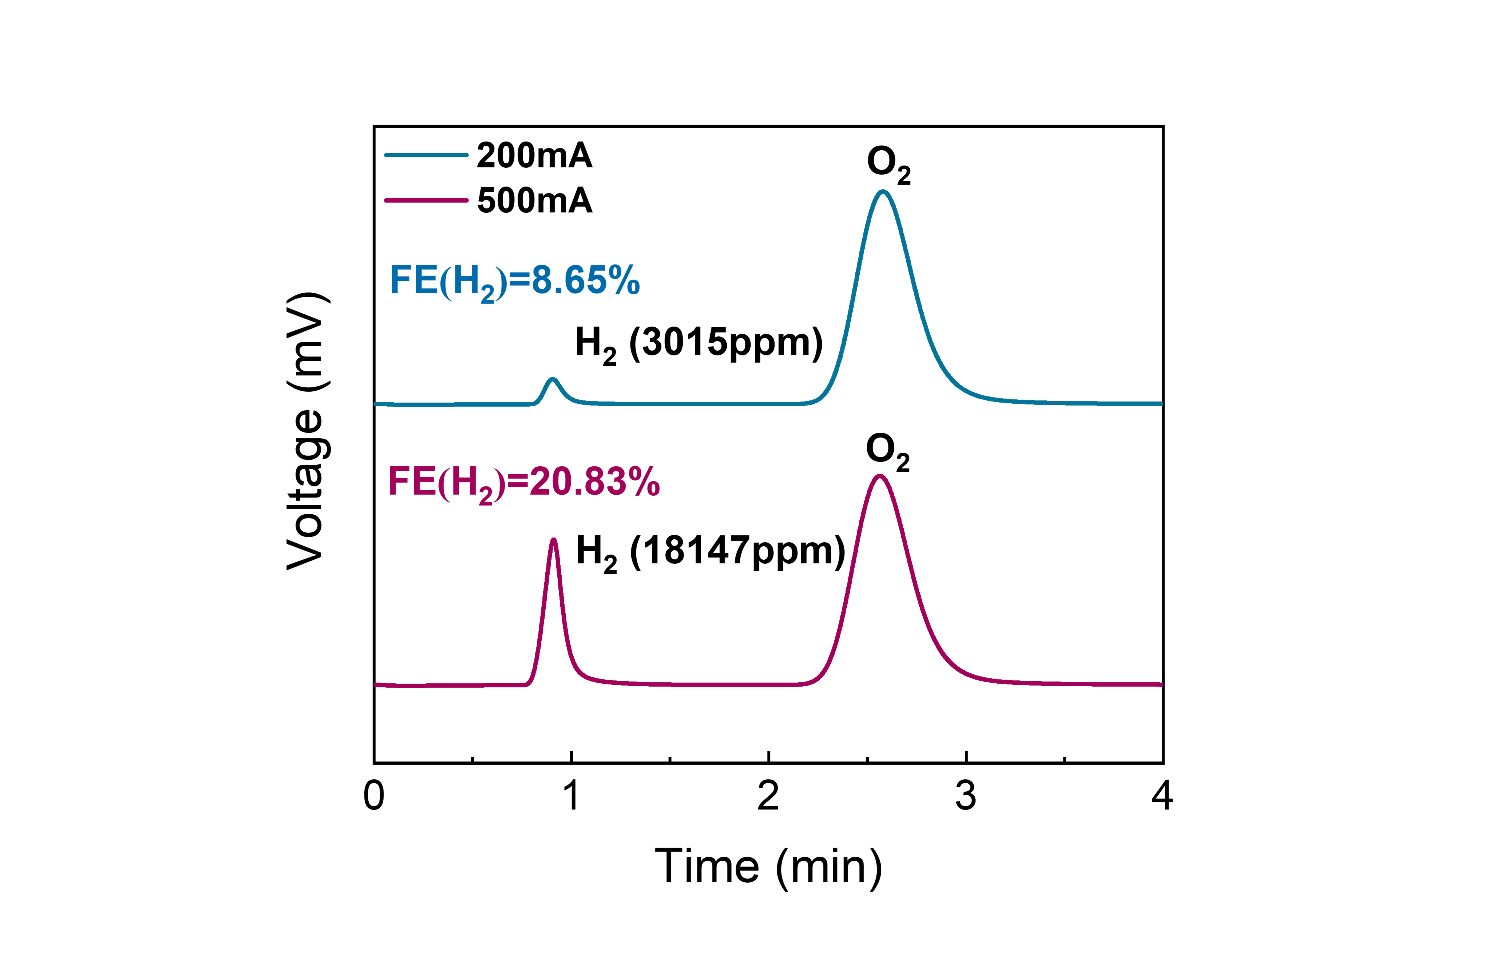


**Supplementary Figure 23. Gas chromatography analysis of the effluent from the flow cell during galvanostatic electrolysis.**

**Supplementary Note 6:** As the potential for electrosynthesis of H2O2 at high currents approaches the range of HER, it is necessary to investigate the HER performance of the cathode catalyst. The curves directly obtained from the equipment and conversion results are shown above. Specifically, only a minor occurrence of HER can be observed at a current of 200 mA cm-2, while HER becomes significant at a current of 500 mA cm-2 owing to the excessively low potential. This situation leads to a substantial loss in Faradaic efficiency, which is one of the main reasons for the challenging achievement of high Faradaic efficiency under high-current conditions.


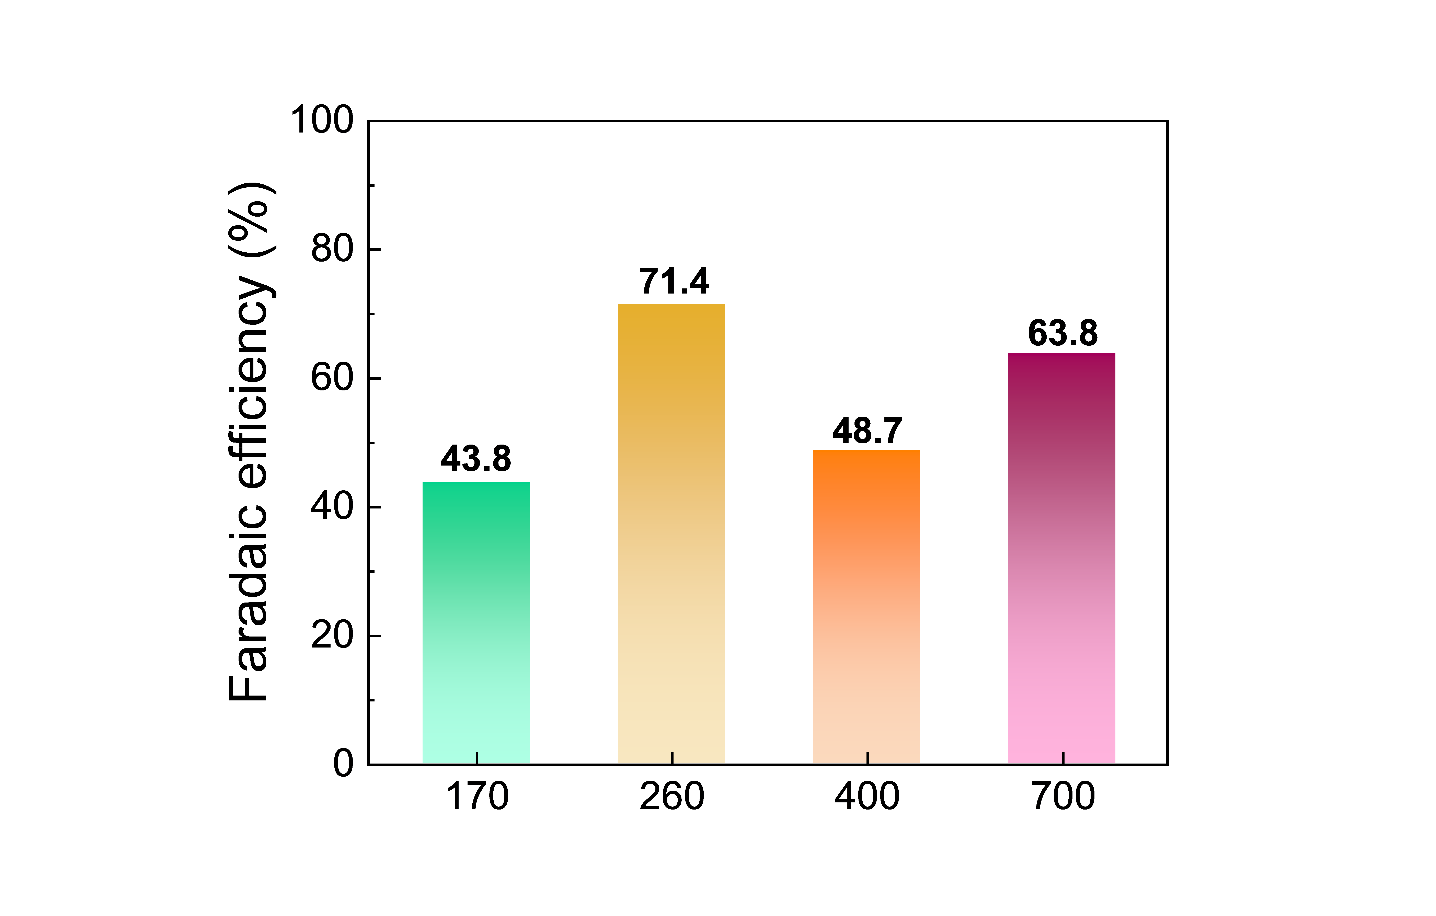


**Supplementary Figure 24. Faradaic efficiency when galvanostatic electrolysis on CoTPP@RGO-170, CoTPP@RGO-260, CoTPP@RGO-400 and CoTPP@RGO-700 in flow cell.**

**Supplementary Note 7:** To investigate the effect of OFGs regulation under high-current conditions, galvanostatic electrolysis was conducted using CoTPP@RGO-170, CoTPP@RGO-260, CoTPP@RGO-400 and CoTPP@RGO-700 as cathode catalysts. Test conditions: 100 ml of electrolyte, 0.5 h, 200 mA cm-2 of the current density, with other conditions remaining the same. The results match well with that on the RRDE.


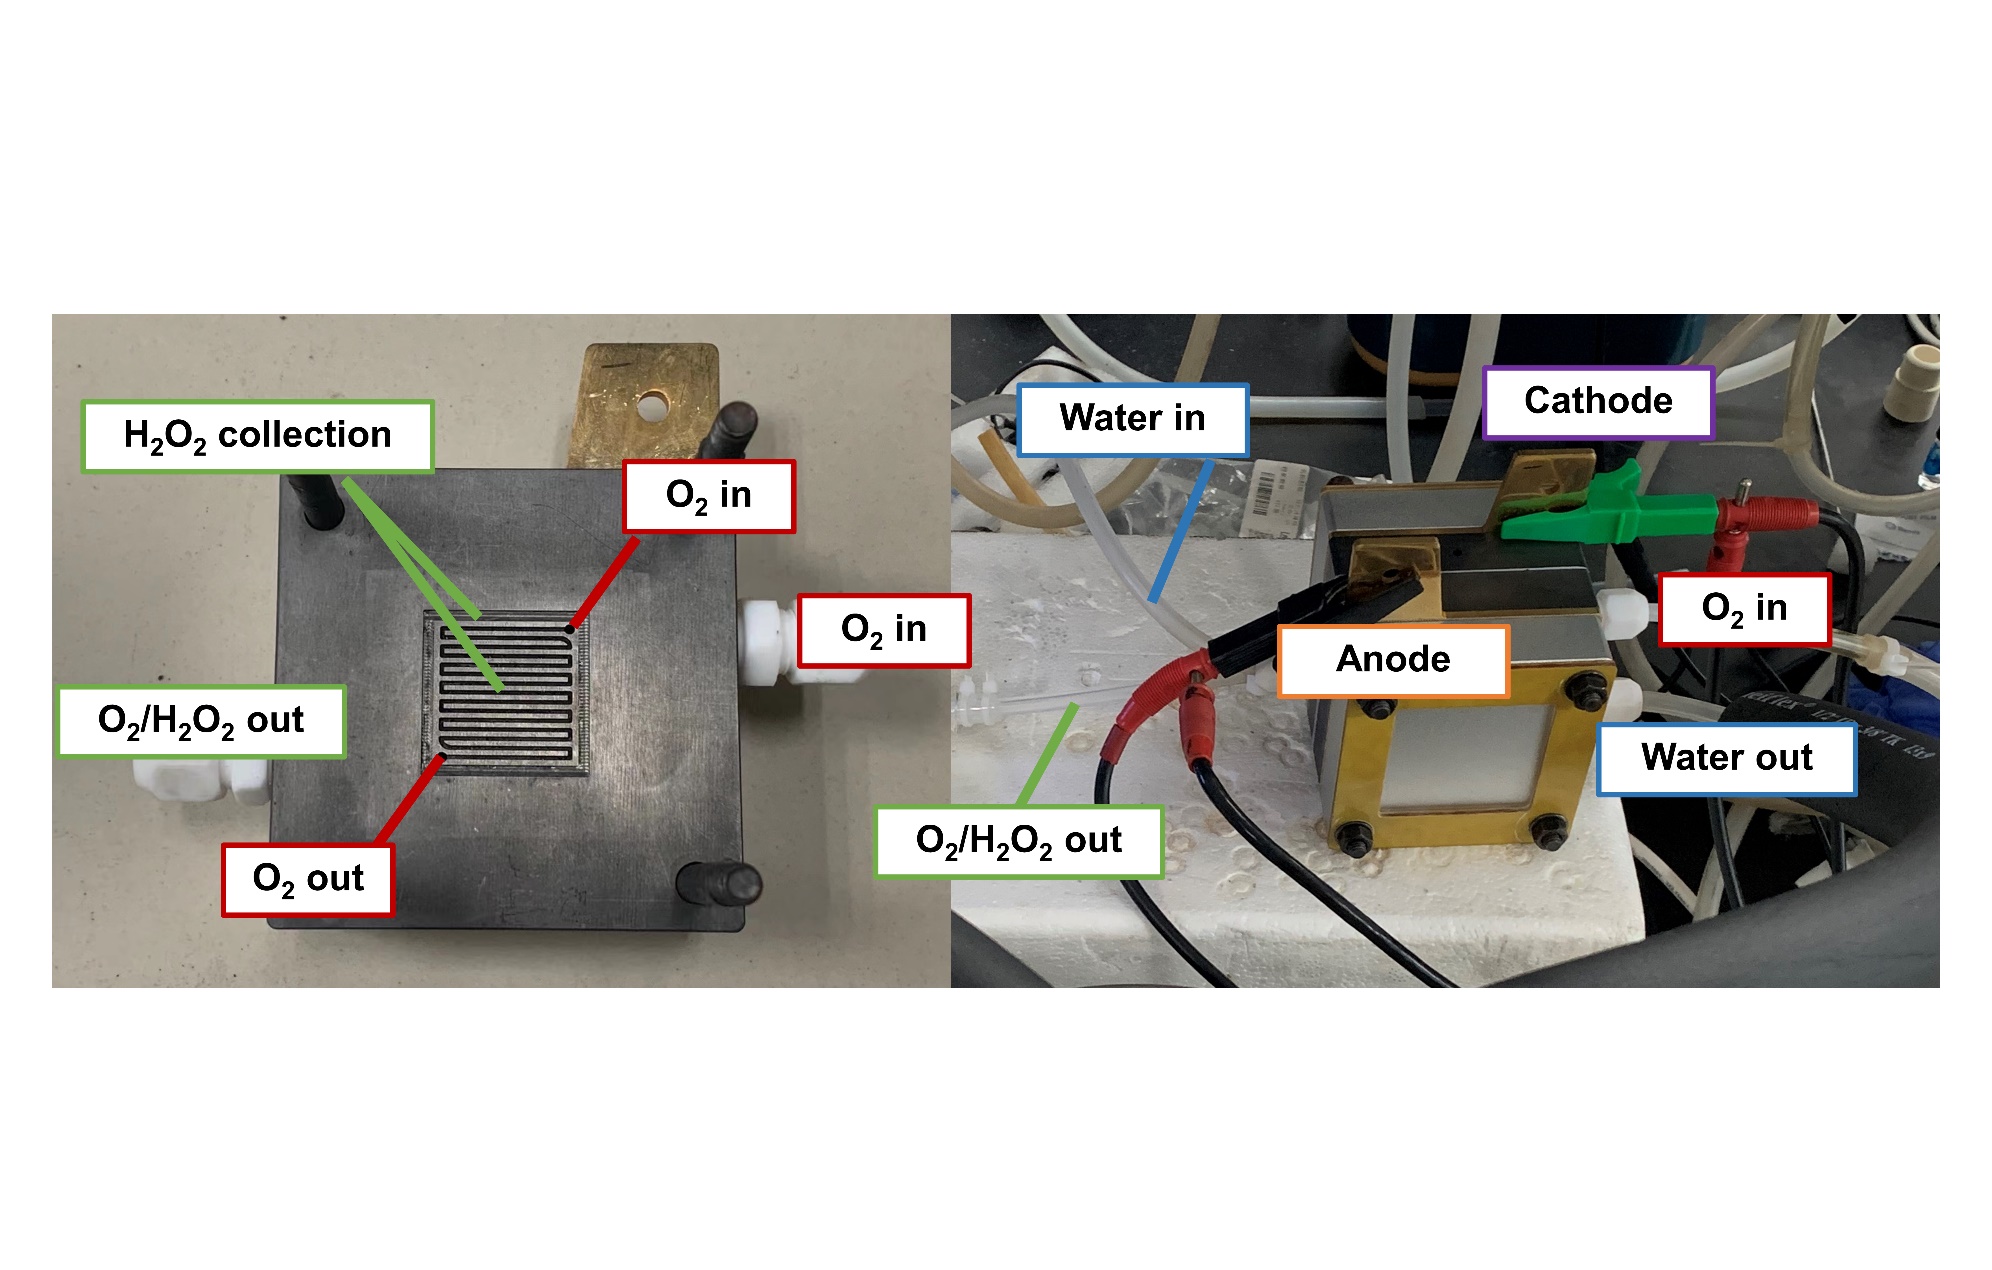


**Supplementary Figure 25. Photographs and descriptions of the PEM electrolyzer for electrosynthesis of high-concentration pure H2O2 at a high current density.**


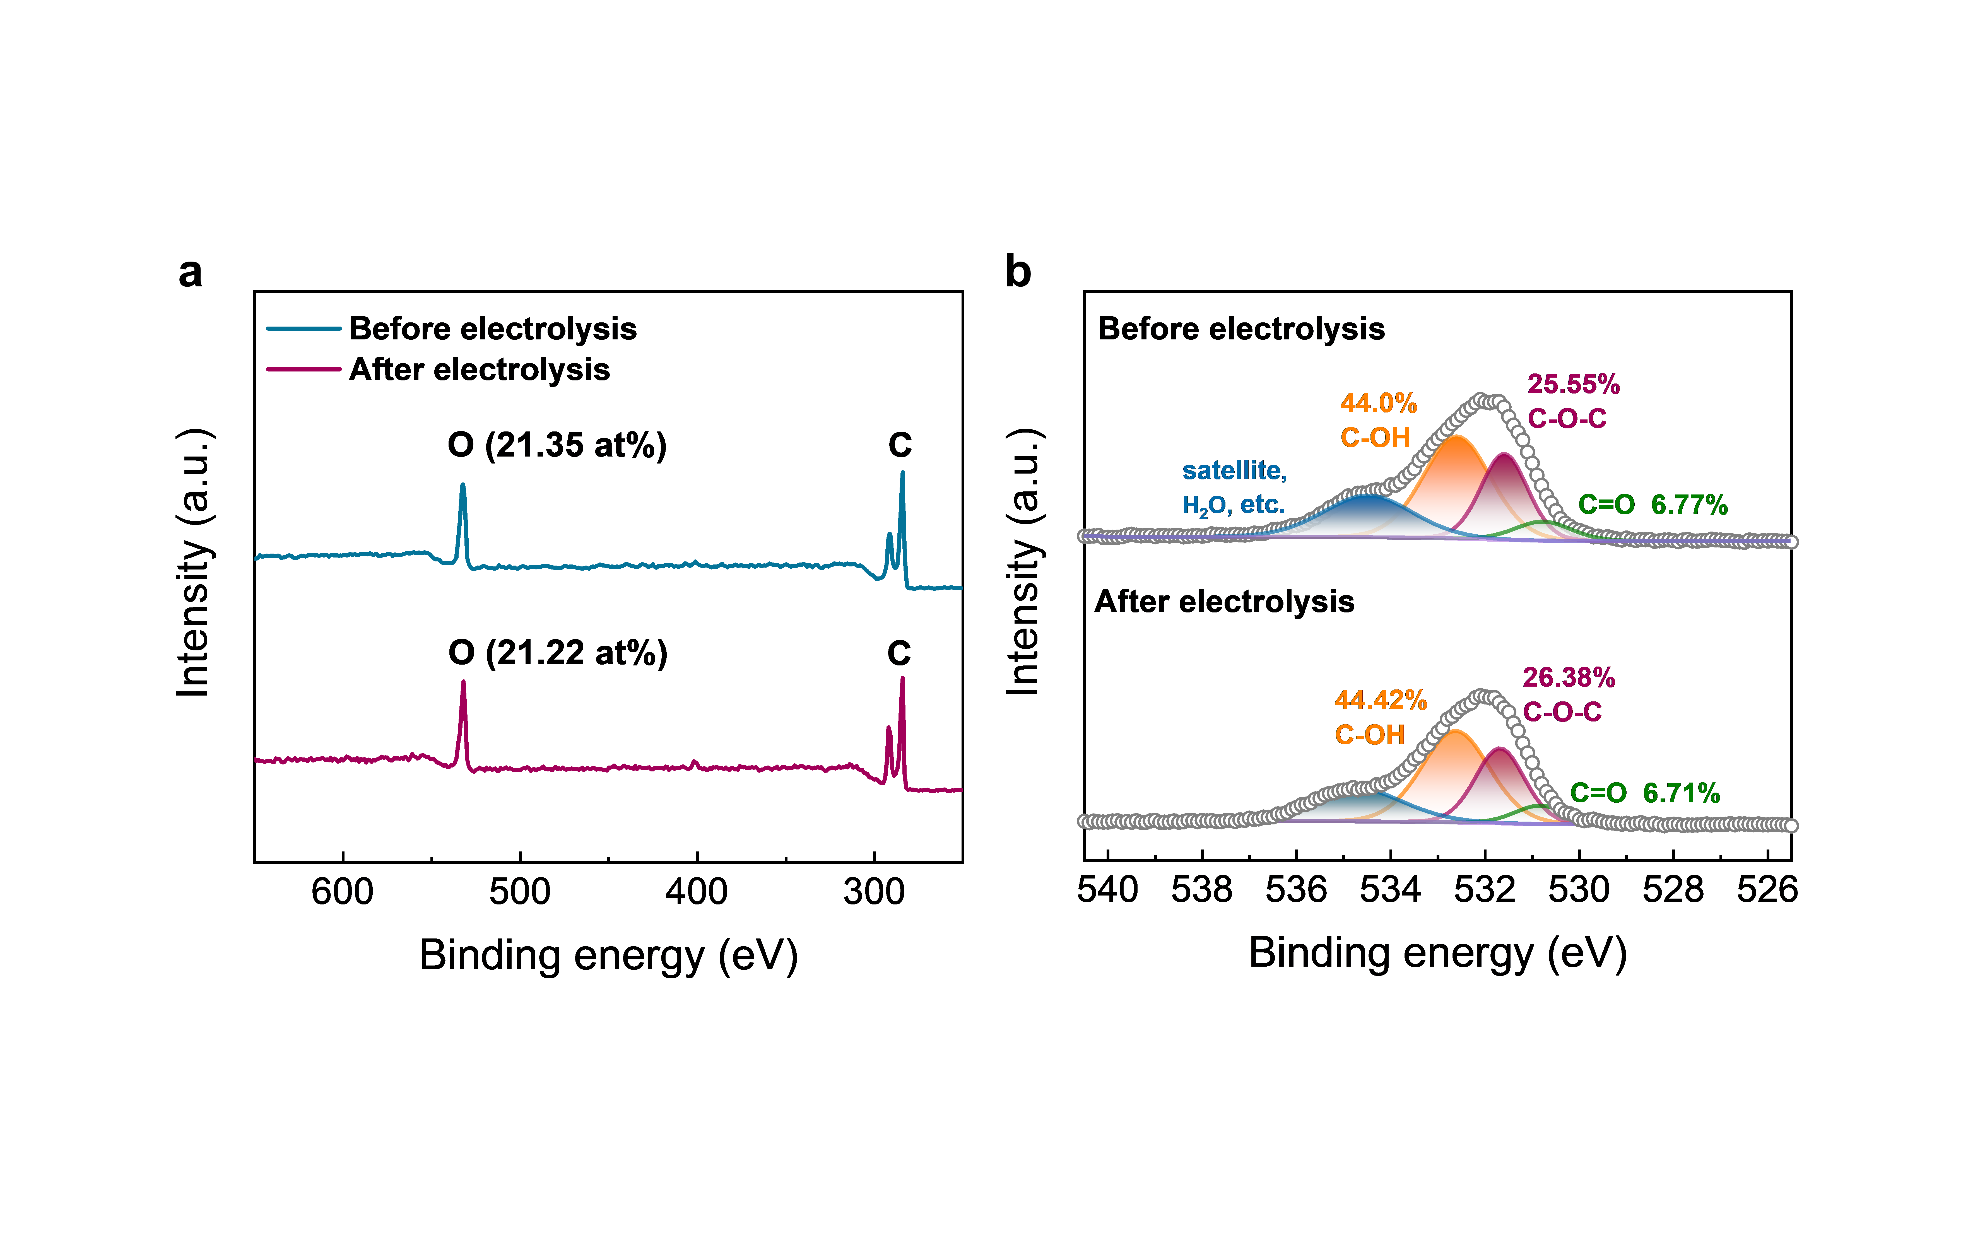


**Supplementary Figure 26. (a) XPS survey spectra and (b) high-resolution O 1s XPS spectra of the cathode catalysts before and after durability test at high current densities.** Neither the O content nor the proportions of different OFGs shows significant variations, indicating the stability of OFGs under high-current electrolysis.

**Supplementary Tables**

**Supplementary Table 1. Elemental ratio of O in RGO measured by XPS spectra.**

| Sample | O content (wt%) |
| --- | --- |
| RGO-160 | 28.01 |
| RGO-170 | 24.9 |
| RGO-260 | 14.56 |
| RGO-400 | 9.92 |
| RGO-700 | 8.96 |

**Supplementary Table 2. Co loadings of CoTPP@RGO catalysts measured by ICP-OES.**

| Sample | Co content (wt‰) |
| --- | --- |
| CoTPP@160RGO | 1.14 |
| CoTPP@170RGO | 1.02 |
| CoTPP@260RGO | 0.414 |
| CoTPP@400RGO | 0.595 |
| CoTPP@700RGO | 0.201 |

**Supplementary Table 3. EXAFS fitting parameters for Co K-edge of CoTPP@RGO-160 and CoTPP@RGO-170.**

| Sample | Shell | *N* | *R*(Å) | *σ*2 | Δ*E*0(eV) | *R* factor |
| --- | --- | --- | --- | --- | --- | --- |
| CoTPP@160RGO | Co-N/O | 5.2±0.5 | 2.03±0.02 | 0.015 | -6.81±2.60 | 0.018 |
| CoTPP@170RGO | Co-N/O | 6.7±0.5 | 2.09±0.02 | 0.0054 | -0.54±1.57 | 0.012 |

*N*: coordination numbers; *R*: bond distance; *σ2*: Debye-Waller factors; *ΔE0*: the inner potential correction; *R* factor: goodness of fit. The Co Foil is taken as standard sample to correct the absorption edge position of Co atom in tested CoTPP@RGO-T.

**Supplementary Table 4. Comparison with high-performance catalysts recently reported for H2O2 electrosynthesis in flow cell.**

| Catalysts | Current density  (mA cm-2) | H2O2 productivity  (mol g-1 h-1) | Media | References |
| --- | --- | --- | --- | --- |
| CoSe2@Bp | 54 | 0.9 | Acidic | [6](#_ENREF_6) |
| PtP2 | 150 | 2.825 | Acidic | [7](#_ENREF_7) |
| CoN4/VG | 210 | 4 | Acidic | [8](#_ENREF_8) |
| N4-Ni1-O2 | 350 | 6 | Alkaline | [9](#_ENREF_9) |
| In SA/NSBC | 90 | 6.49 | Alkaline | [10](#_ENREF_10) |
| NPC | 100 | 8.53 | Alkaline | [11](#_ENREF_11) |
| Co HSACs | 300 | 10 | Alkaline | [12](#_ENREF_12) |
| CoPorF/CNT | 288 | 10.76 | Acidic | [13](#_ENREF_13) |
| CoPc-OCNT | 300 | 11.5 | Alkaline | [14](#_ENREF_14) |
| CoTPP@RGO-160 | 50 | 5.54 | Acidic | This work |
| CoTPP@RGO-160 | 200 | 19.47 | Acidic | This work |
| CoTPP@RGO-160 | 500 | 42.26 | Acidic | This work |

**Supplementary Table 5. Comparison with high-performance catalysts recently reported for high-concentration aqueous H2O2 electrosynthesis in various reactors.**

| Catalysts | Current density  (mA cm-2) | H2O2 concentration  (wt%) | Reactor | References |
| --- | --- | --- | --- | --- |
| Fe-C-O | 20 | 0.16 | Other | [15](#_ENREF_15) |
| Bp2000 | 50 | 0.5 | PEM | [16](#_ENREF_16) |
| Co-N SACDP | 50 | 2.03 | Flow cell | [17](#_ENREF_17) |
| CoPc-OCNT | 200 | 2.57 | Flow cell | [14](#_ENREF_14) |
| NPC | 300 | 3.35 | Flow cell | [11](#_ENREF_11) |
| CoPc-CNT(O) | 300 | 4.6 | Flow cell | [18](#_ENREF_18) |
| CB-10% | 120 | 11 | AEM | [19](#_ENREF_19) |
| CoTPP@RGO-160 | 200 | 11 | PEM | This work |

**Supplementary References**

1. Li Y*, et al.* Electron transfer rules of minerals under pressure informed by machine learning. *Nat. Commun.* **14**, (2023).

2. Hou Y*, et al.* Efficient tandem solar cells with solution-processed perovskite on textured crystalline silicon. *Science* **367**, 1135-1140 (2020).

3. Gong H*, et al.* Low-coordinated Co-N-C on oxygenated graphene for efficient electrocatalytic H2O2 production. *Adv. Funct. Mater.* **32**, 2106886 (2021).

4. Xu S*, et al.* Synergistic effects in N,O-comodified carbon nanotubes boost highly selective electrochemical oxygen reduction to H2O2. *Adv Sci (Weinh)* **9**, e2201421 (2022).

5. Stankovich S, Piner RD, Nguyen ST, Ruoff RS. Synthesis and exfoliation of isocyanate-treated graphene oxide nanoplatelets. *Carbon* **44**, 3342-3347 (2006).

6. Zheng YR*, et al.* Black phosphorous mediates surface charge redistribution of CoSe2 for electrochemical H2O2 production in acidic electrolytes. *Adv. Mater.* **34**, e2205414 (2022).

7. Li H*, et al.* Scalable neutral H2O2 electrosynthesis by platinum diphosphide nanocrystals by regulating oxygen reduction reaction pathways. *Nat. Commun.* **11**, 3928 (2020).

8. Lin Z*, et al.* Atomic Co decorated free-standing graphene electrode assembly for efficient hydrogen peroxide production in acid. *Energy Environ. Sci.* **15**, 1172-1182 (2022).

9. Xiao C*, et al.* Super-coordinated nickel N4Ni1O2 site single-atom catalyst for selective H2O2 electrosynthesis at high current densities. *Angew. Chem. Int. Ed.* **61**, e202206544 (2022).

10. Zhang E*, et al.* Engineering the local atomic environments of indium single-atom catalysts for efficient electrochemical production of hydrogen peroxide. *Angew. Chem. Int. Ed.* **61**, e202117347 (2022).

11. Cao P, Quan X, Zhao K, Zhao X, Chen S, Yu H. Durable and selective electrochemical H2O2 synthesis under a large current enabled by the cathode with highly hydrophobic three-phase architecture. *ACS Catal.* **11**, 13797-13808 (2021).

12. Fan W*, et al.* Rational design of heterogenized molecular phthalocyanine hybrid single-atom electrocatalyst towards two-electron oxygen reduction. *Nat. Commun.* **14**, 1426 (2023).

13. Liu C*, et al.* Heterogeneous molecular Co–N–C catalysts for efficient electrochemical H2O2 synthesis. *Energy Environ. Sci.* **16**, 446-459 (2023).

14. Cao P*, et al.* Metal single-site catalyst design for electrocatalytic production of hydrogen peroxide at industrial-relevant currents. *Nat. Commun.* **14**, 172 (2023).

15. Jiang K*, et al.* Highly selective oxygen reduction to hydrogen peroxide on transition metal single atom coordination. *Nat. Commun.* **10**, 3997 (2019).

16. Zhang X*, et al.* Electrochemical oxygen reduction to hydrogen peroxide at practical rates in strong acidic media. *Nat. Commun.* **13**, 2880 (2022).

17. Chen S*, et al.* Identification of the highly active Co-N4 coordination motif for selective oxygen reduction to hydrogen peroxide. *J. Am. Chem. Soc.* **144**, 14505-14516 (2022).

18. Lee B-H*, et al.* Supramolecular tuning of supported metal phthalocyanine catalysts for hydrogen peroxide electrosynthesis. *Nat. Catal.* **6**, 234-243 (2023).

19. Xia C, Xia Y, Zhu P, Fan L, Wang H. Direct electrosynthesis of pure aqueous H2O2 solutions up to 20% by weight using a solid electrolyte. *Science* **366**, 226-231 (2019).
